# Supplementary material
Source: Research Square preprint supplement (doi:10.21203/rs.3.rs-8544011/v1)
Supplement: Supplementary file 1 [file 4f86f6dc2b69ebcdb2aaea6a.docx]

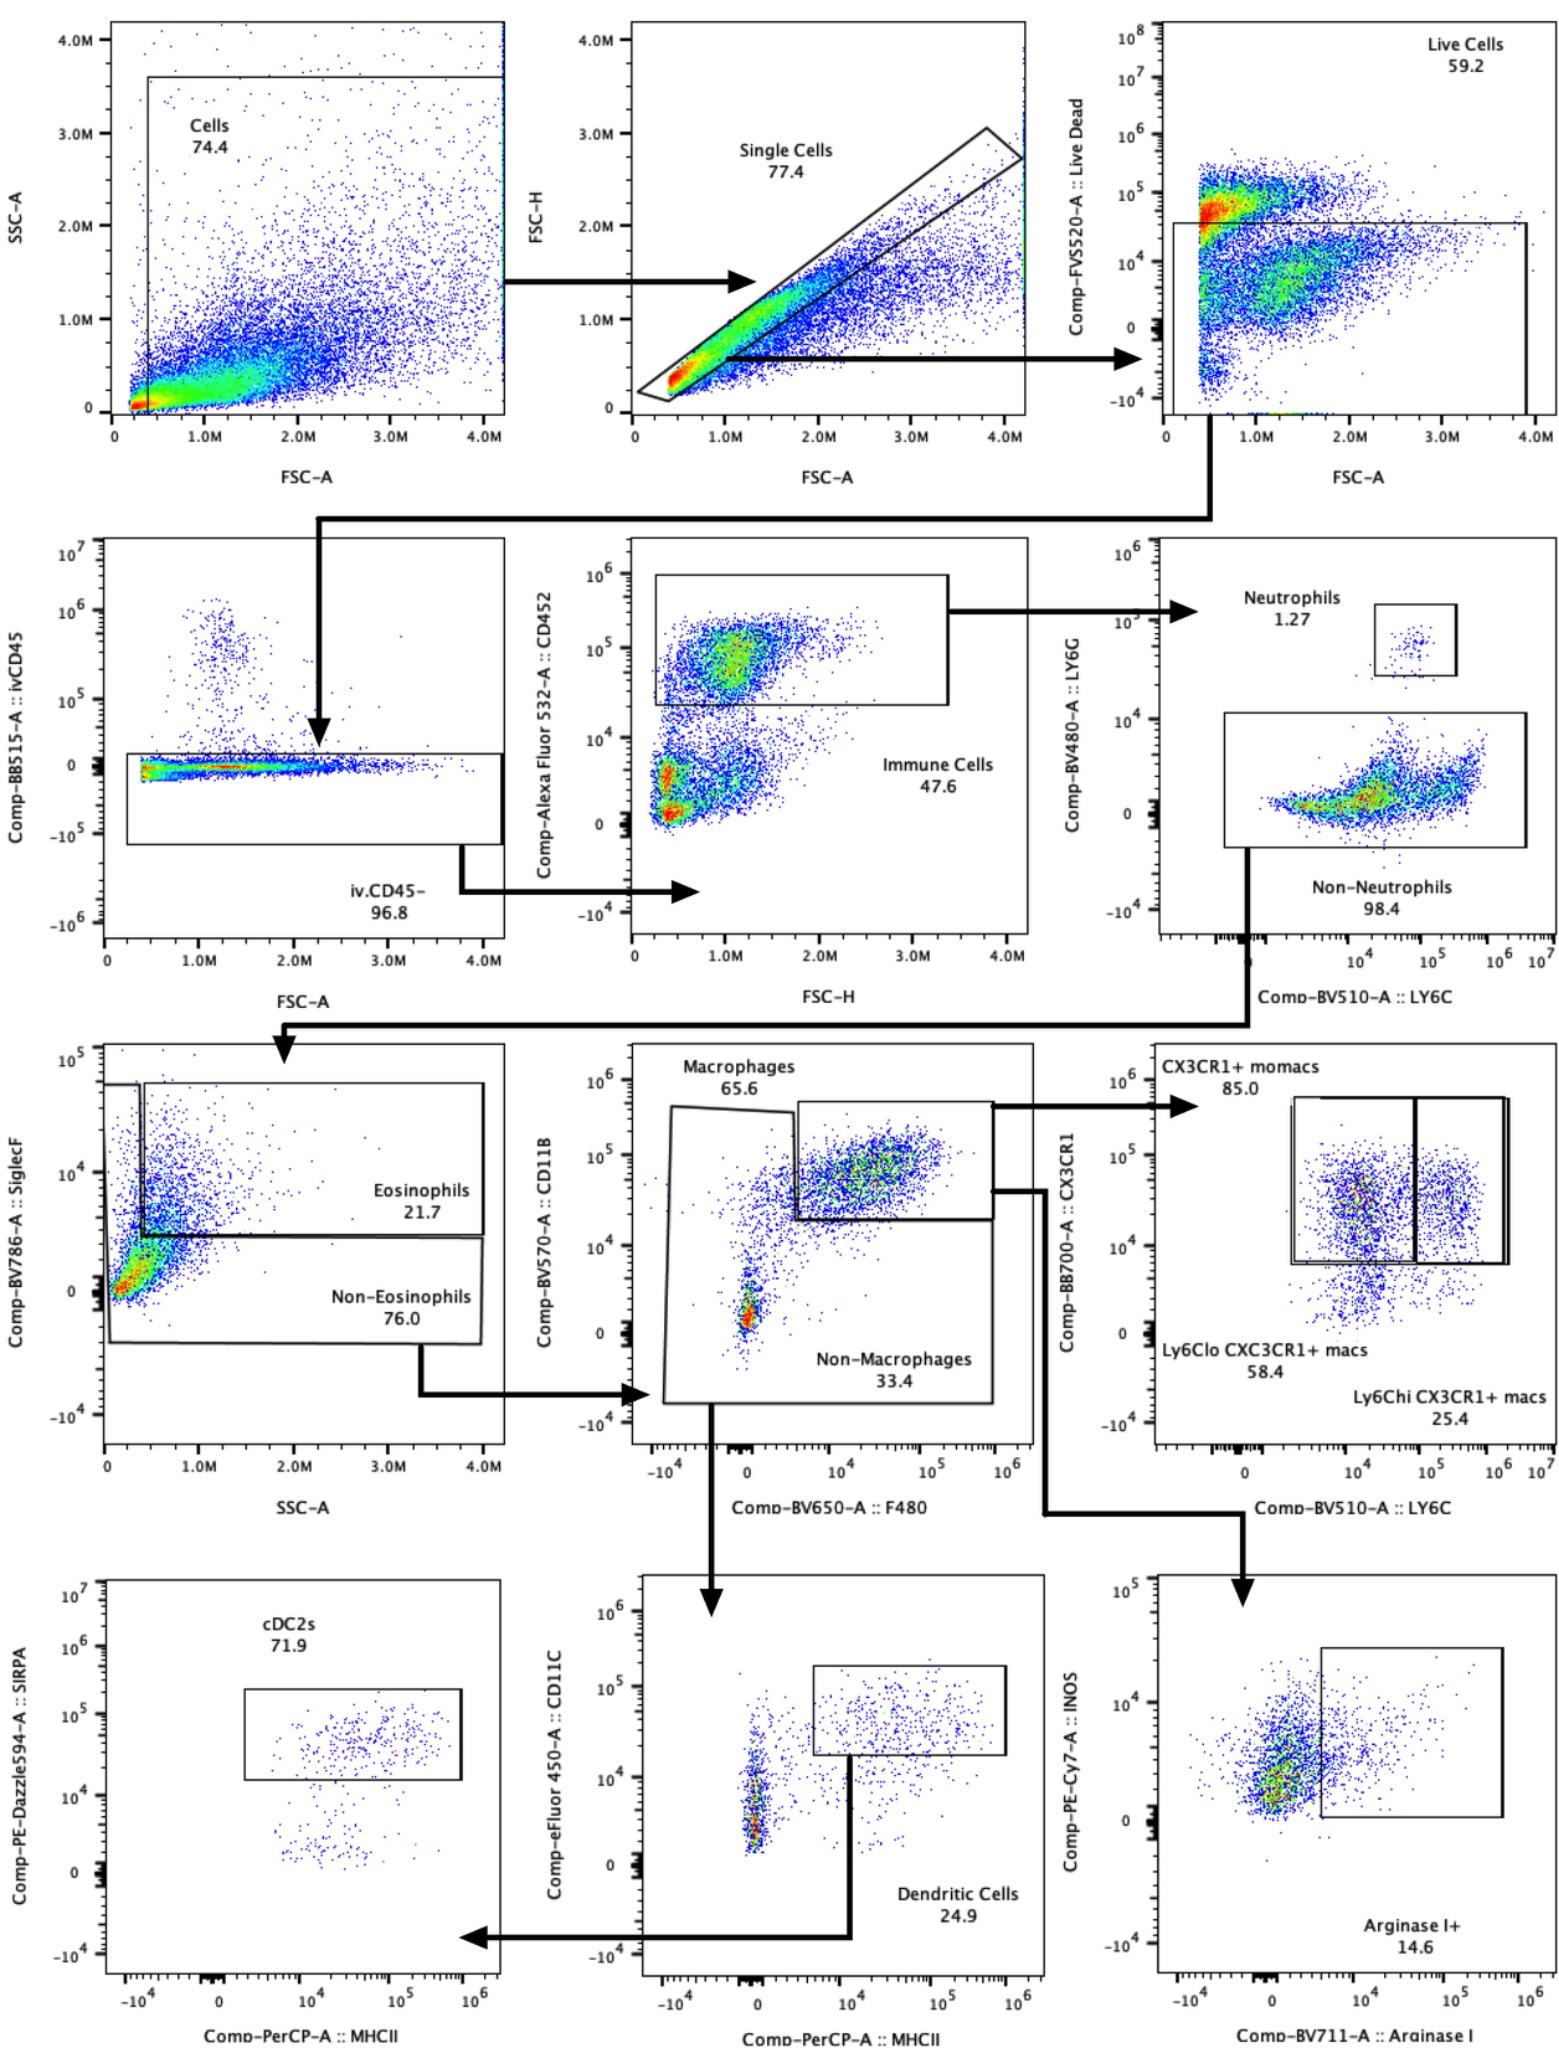


Supplementary Figure 1. **Flow cytometry gating strategy used to quantify the myeloid population in the quadriceps muscles.**

**
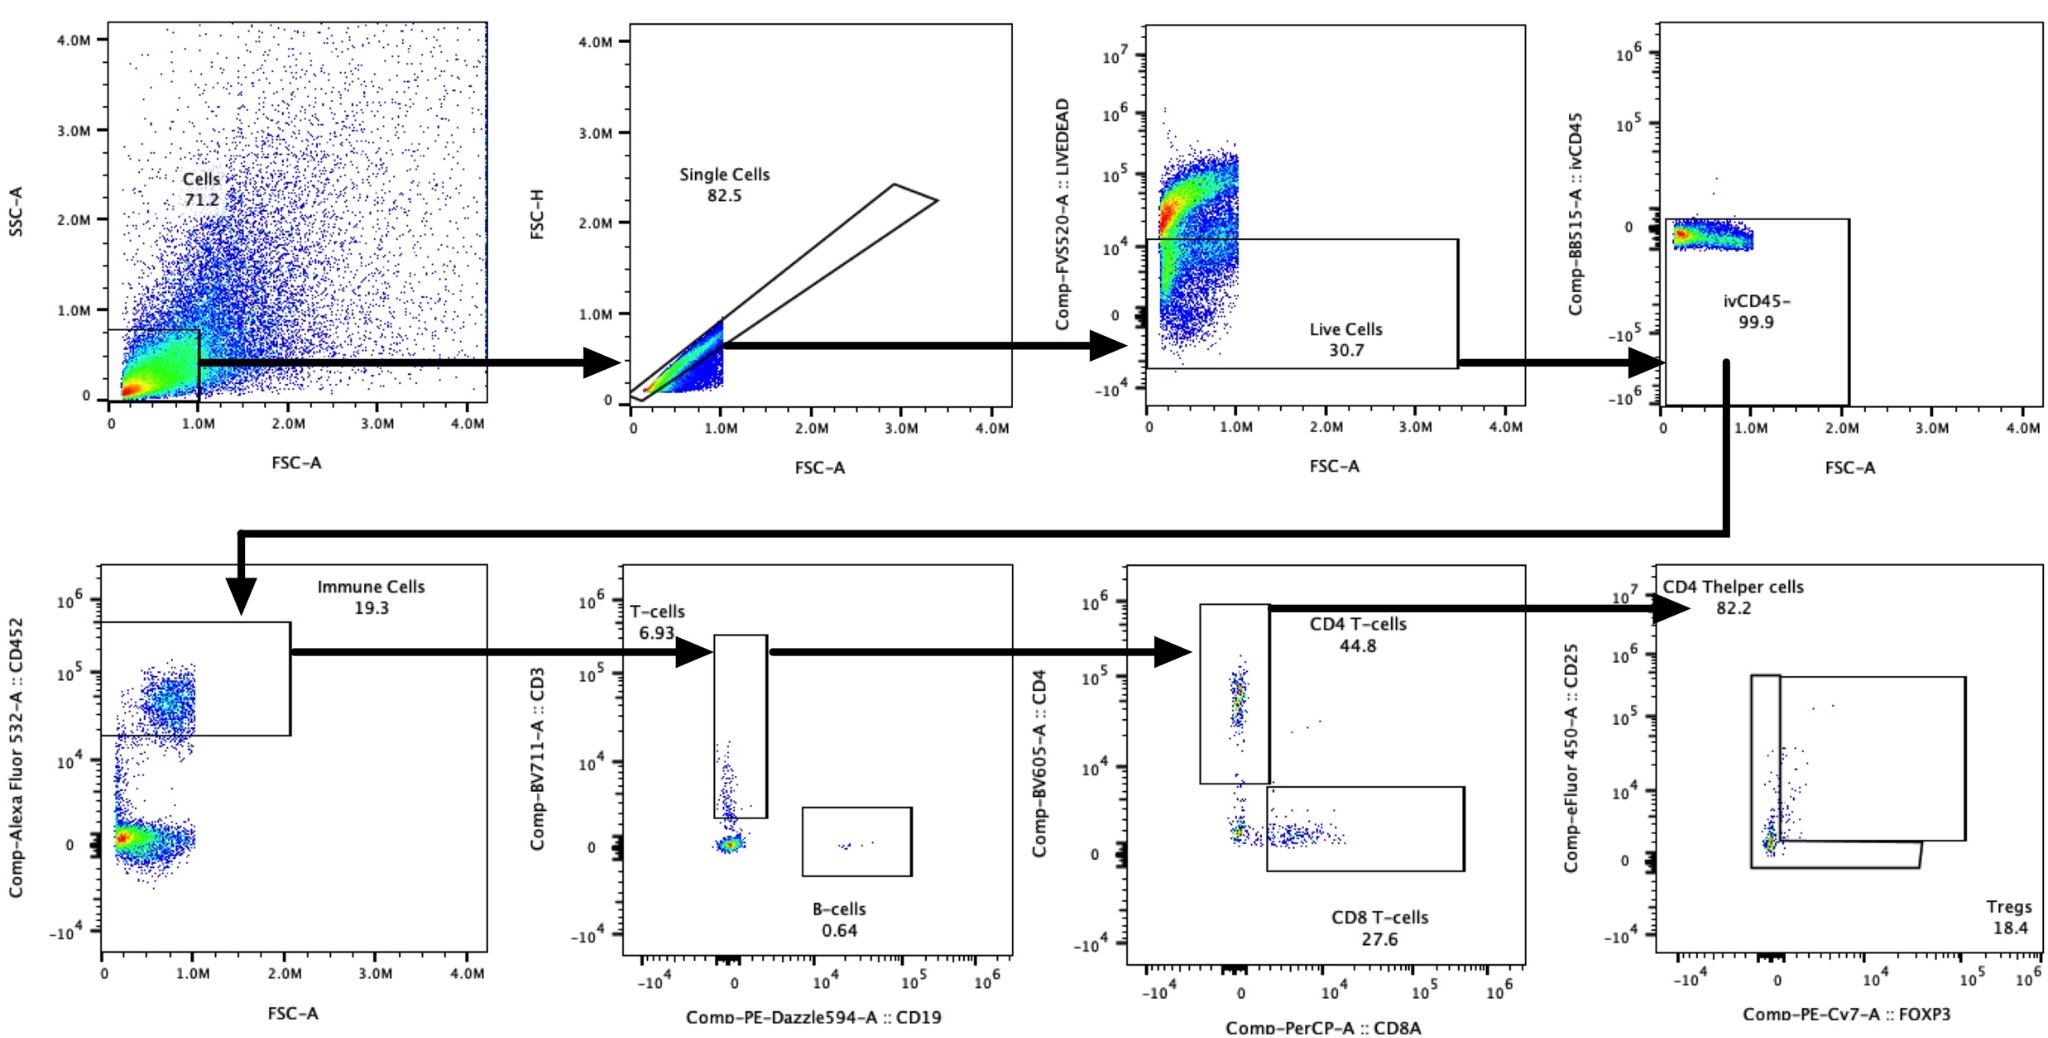
**

Supplementary Figure 2. **Flow cytometry gating strategy used to quantify the lymphocyte populations in the quadriceps muscles.**

**
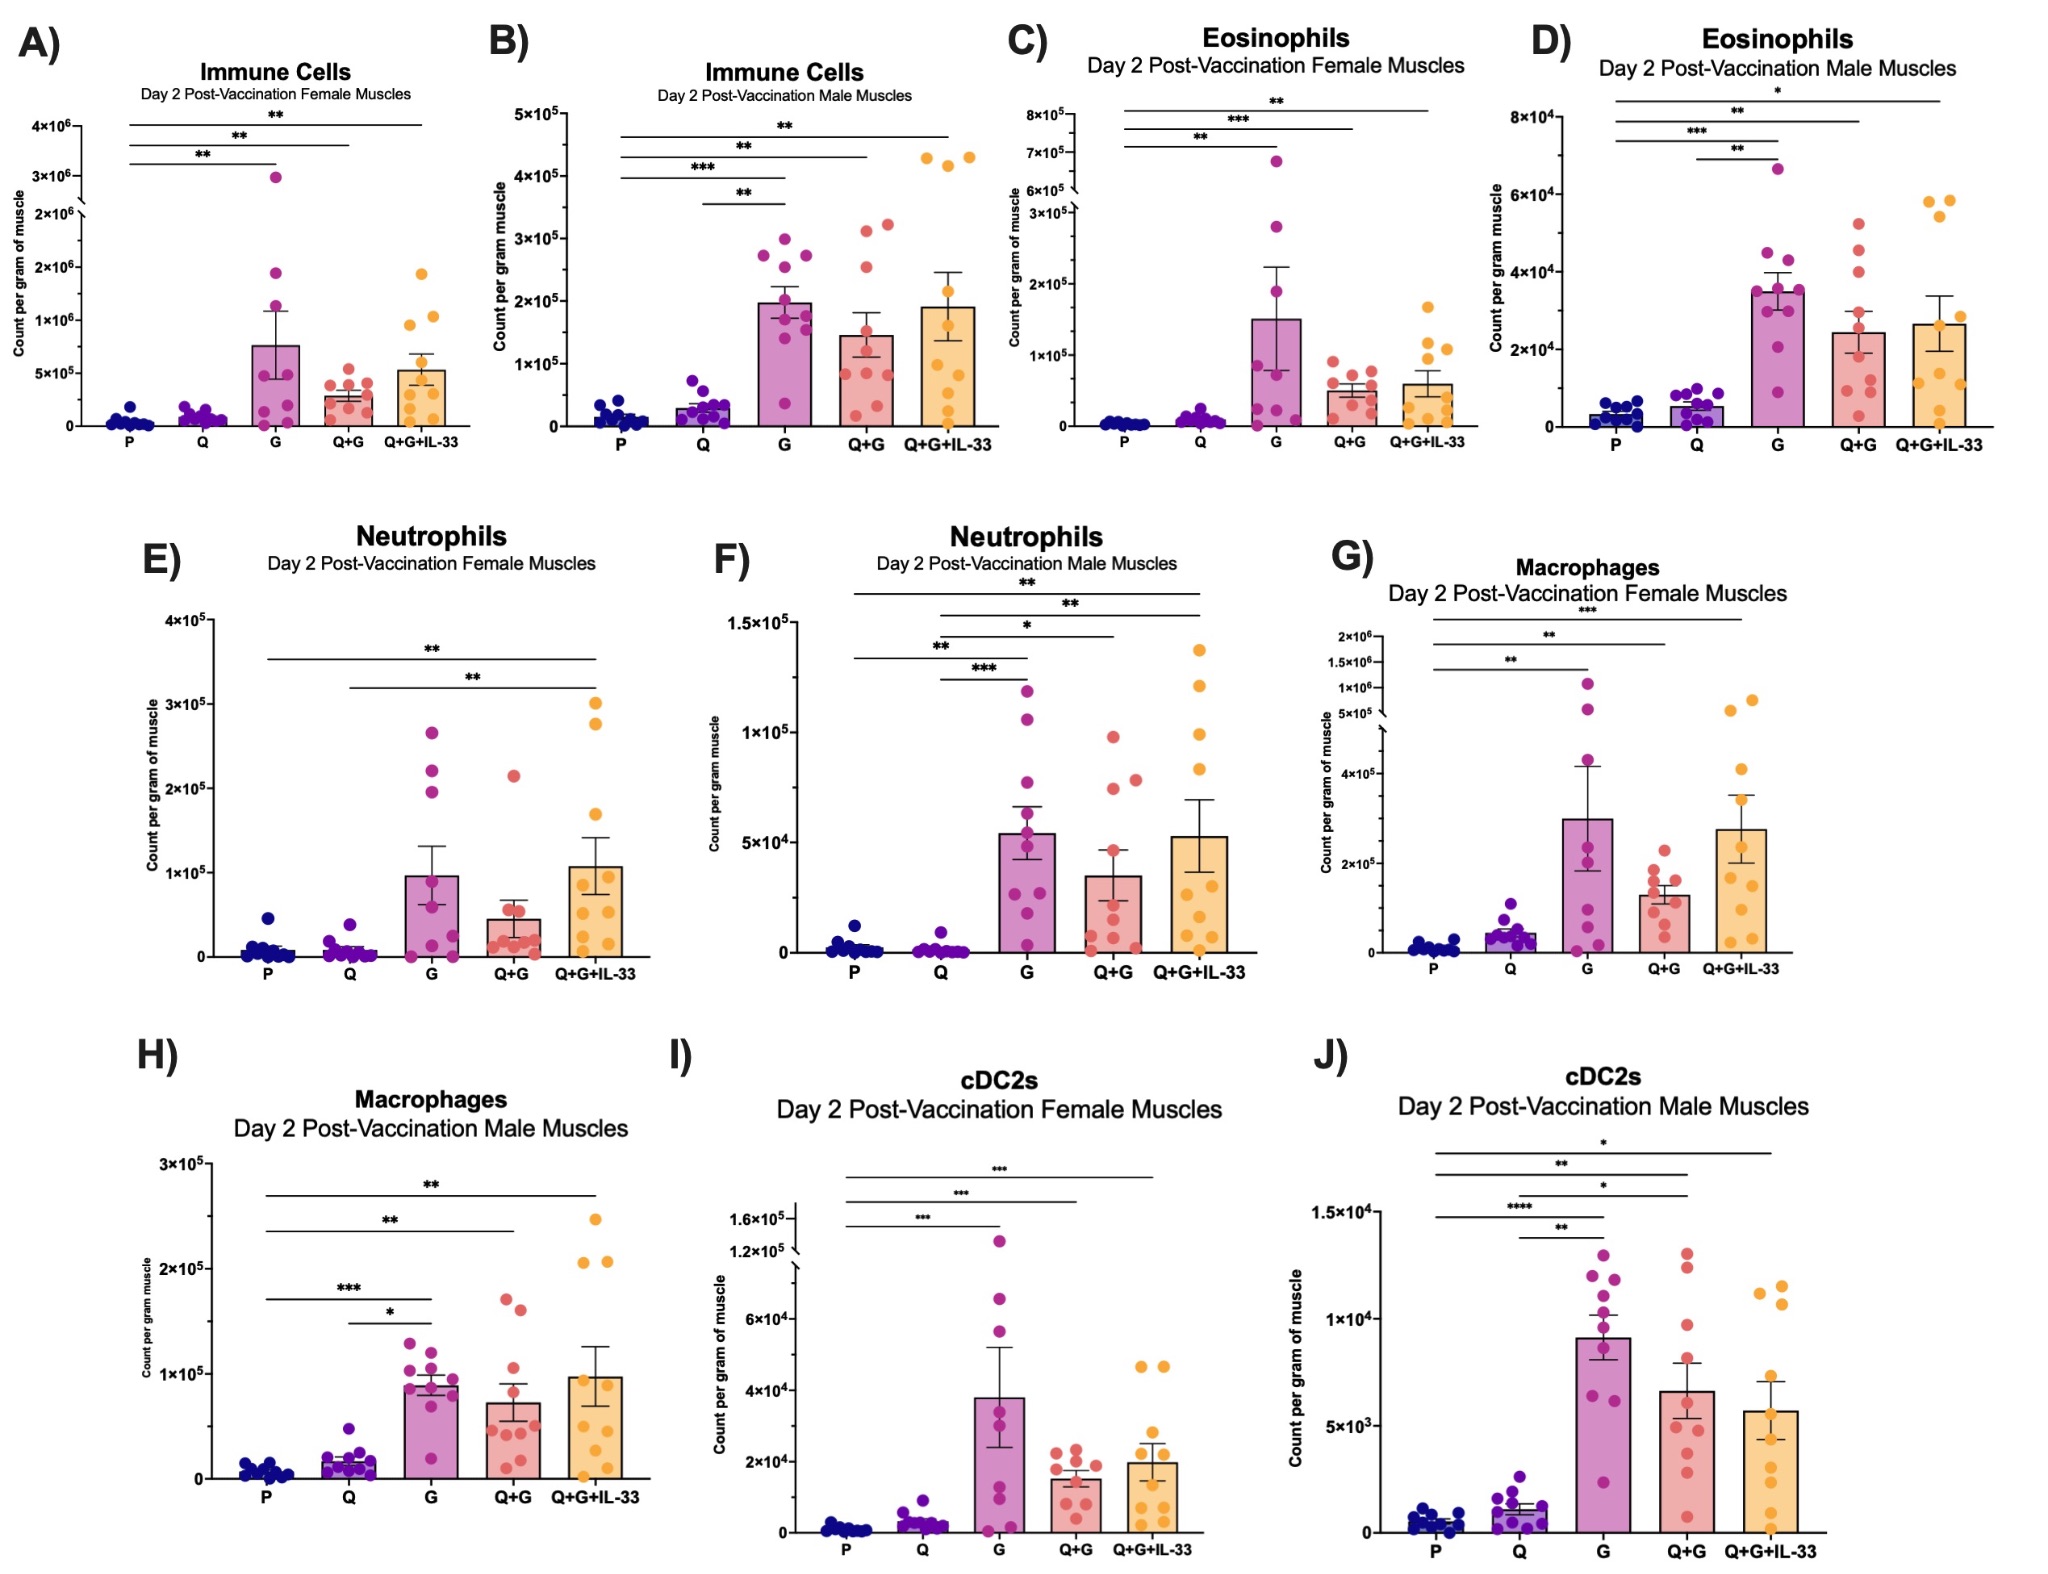
**

Supplementary Figure 3. **Immune characterization of injected muscles using spectral flow cytometry on day 2.** Count of non-circulating **(A)** total Immune cells in females, **(B)** total immune cells in males, **(C)** eosinophils in females, **(D)** eosinophils in males, **(E)** neutrophils in females, **(F)** neutrophils in males, **(G)** macrophages in females, **(H)** macrophages in males, **(I)** cDC2s in females, **(J)** cDC2s in males per gram of muscle 2 days after injection with PBS, Q, G, Q+G, and Q+G+IL-33. * P ≤ 0.05 ** P ≤ 0.01 *** P ≤ 0.001 **** P ≤ 0.0001 (Kruskall-Wallis followed by Dunn’s multiple comparisons test).


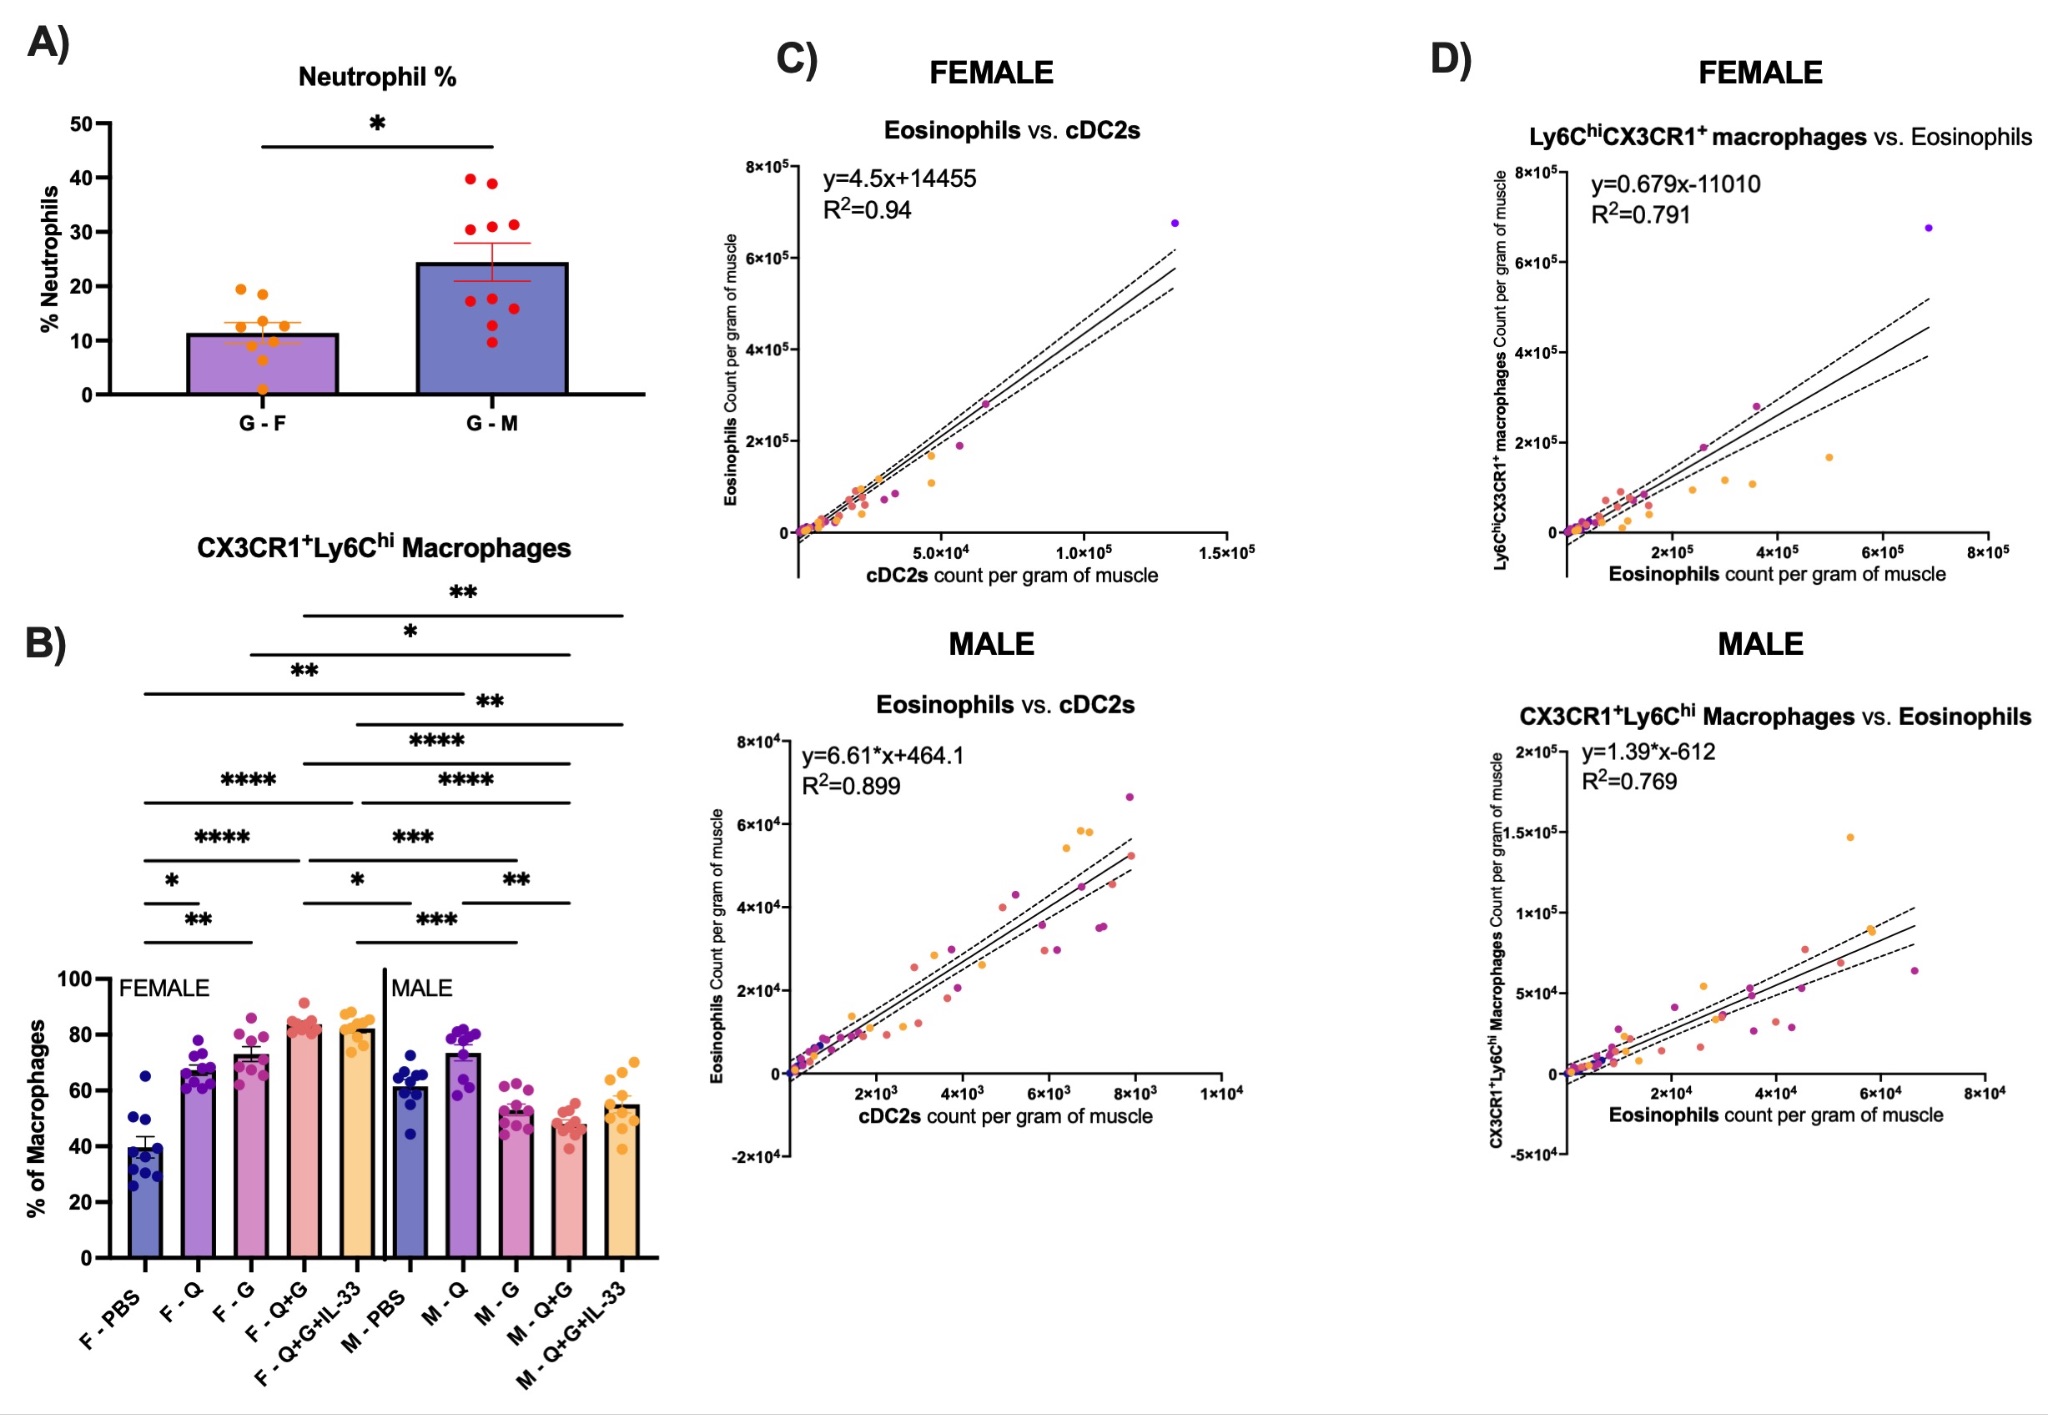


Supplementary Figure 4. **Characterization of sex-dependent changes in immune compositions and correlation tests between immune populations in quadriceps on day 2. (A)** counts of neutrophils per milligram in male and female G groups. **(B)** CX3CR1+Ly6Chi macrophage percentages of total macrophages per group in male and female quadriceps 2 days after injection with P, Q, G, Q+G, or Q+G+IL-33. **(C)** Correlation of eosinophil cell count per milligram of muscle with cDC2 count per milligram of muscle in the quadriceps on day 2 in all groups. **(D)** Correlation of CX3CR1+Ly6Chi macrophage cell count per milligram of muscle with eosinophils count per milligram of muscle in the quadriceps on day 2 in all groups. * P ≤ 0.05 ** P ≤ 0.01 *** P ≤ 0.001 **** P ≤ 0.0001 (Kruskall Wallis followed by Dunn’s multiple comparisons test).


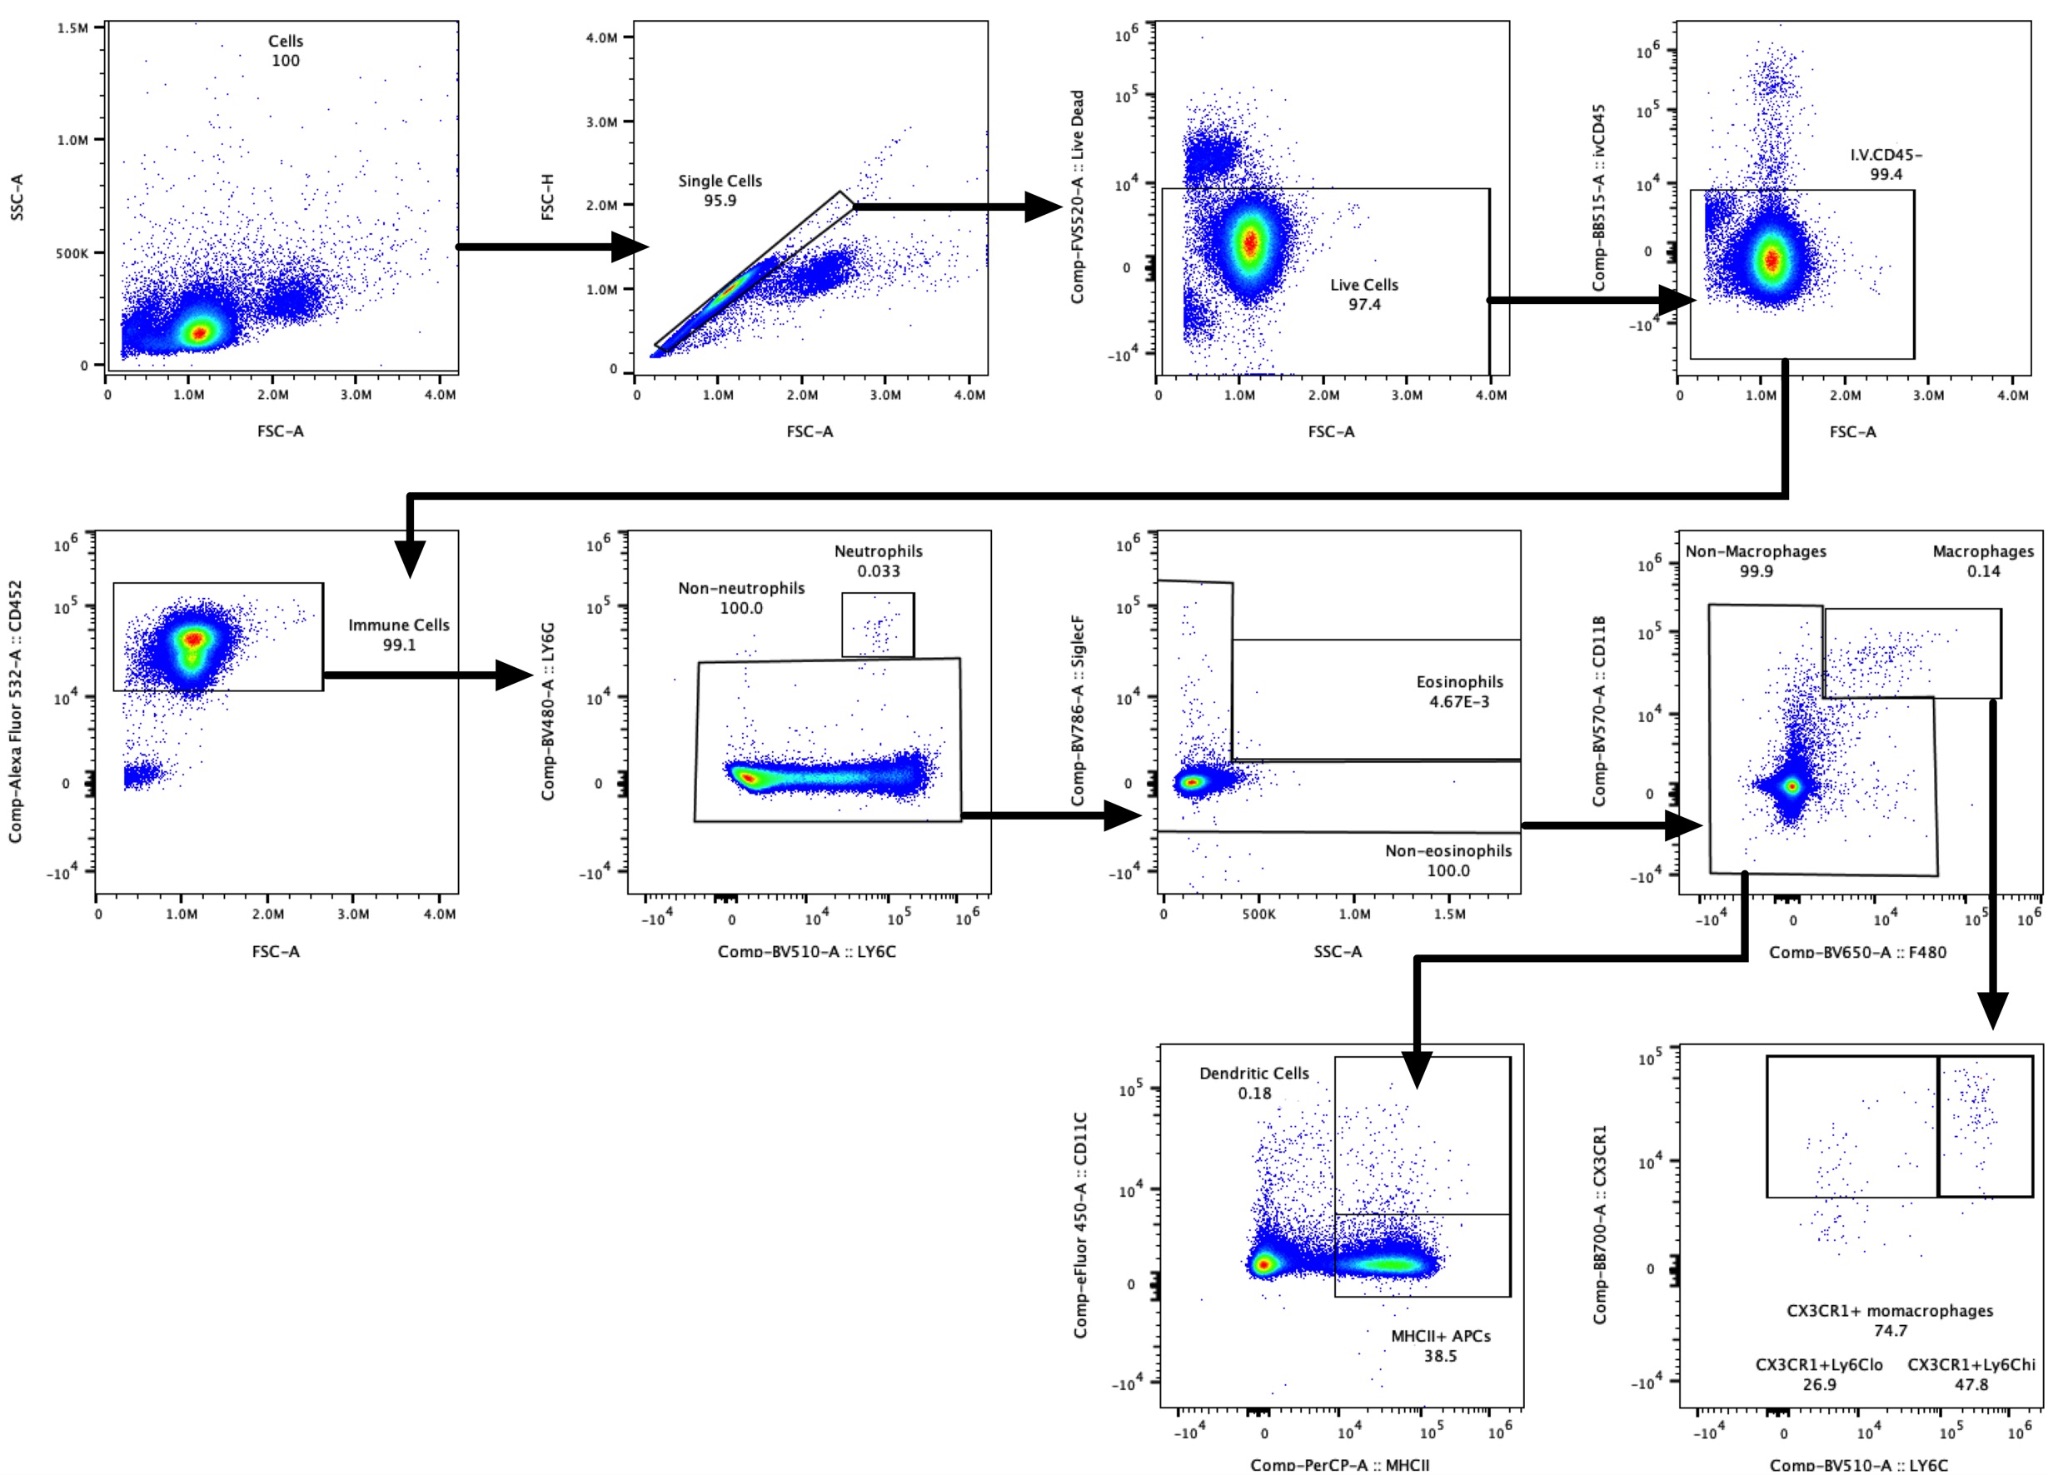


Supplementary Figure 5. **Flow cytometry gating strategy used to quantify myeloid populations in the inguinal draining lymph nodes.**


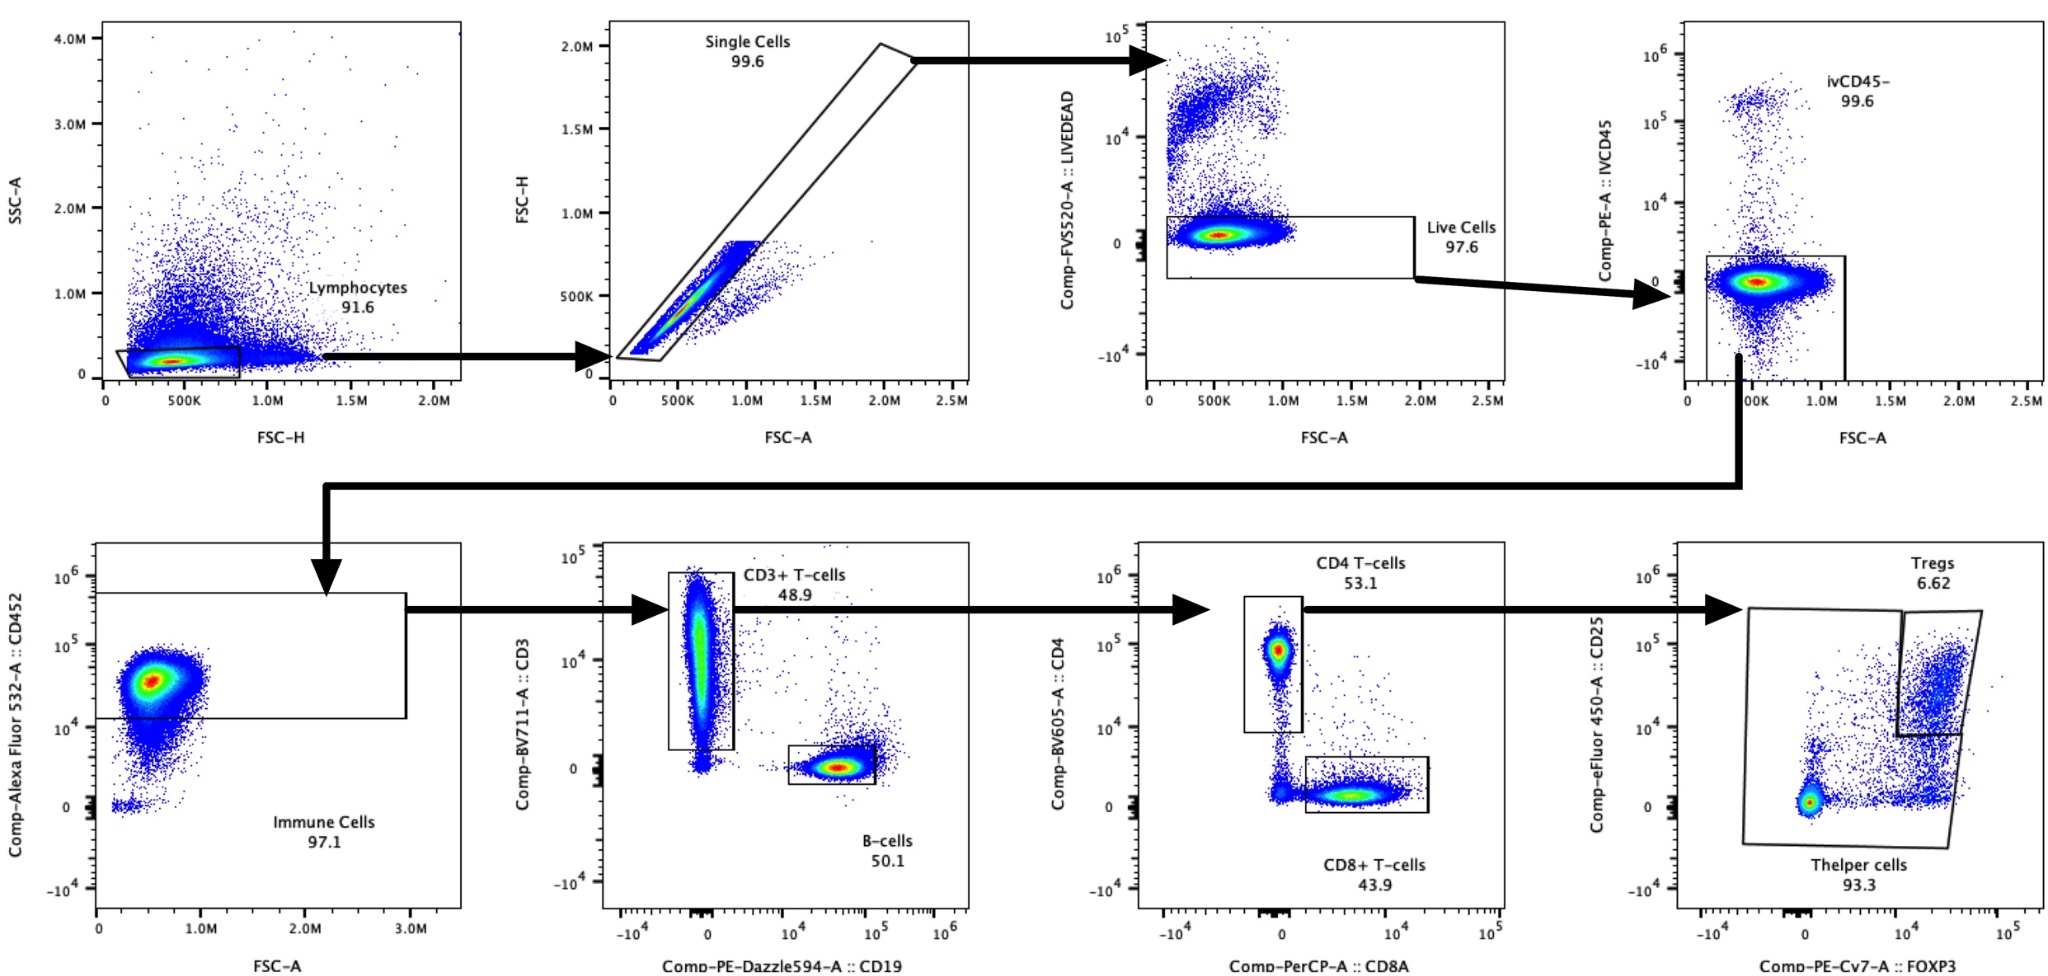


Supplementary Figure 6. **Flow cytometry gating strategy used to quantify lymphocyte populations in the inguinal draining lymph nodes.**

**
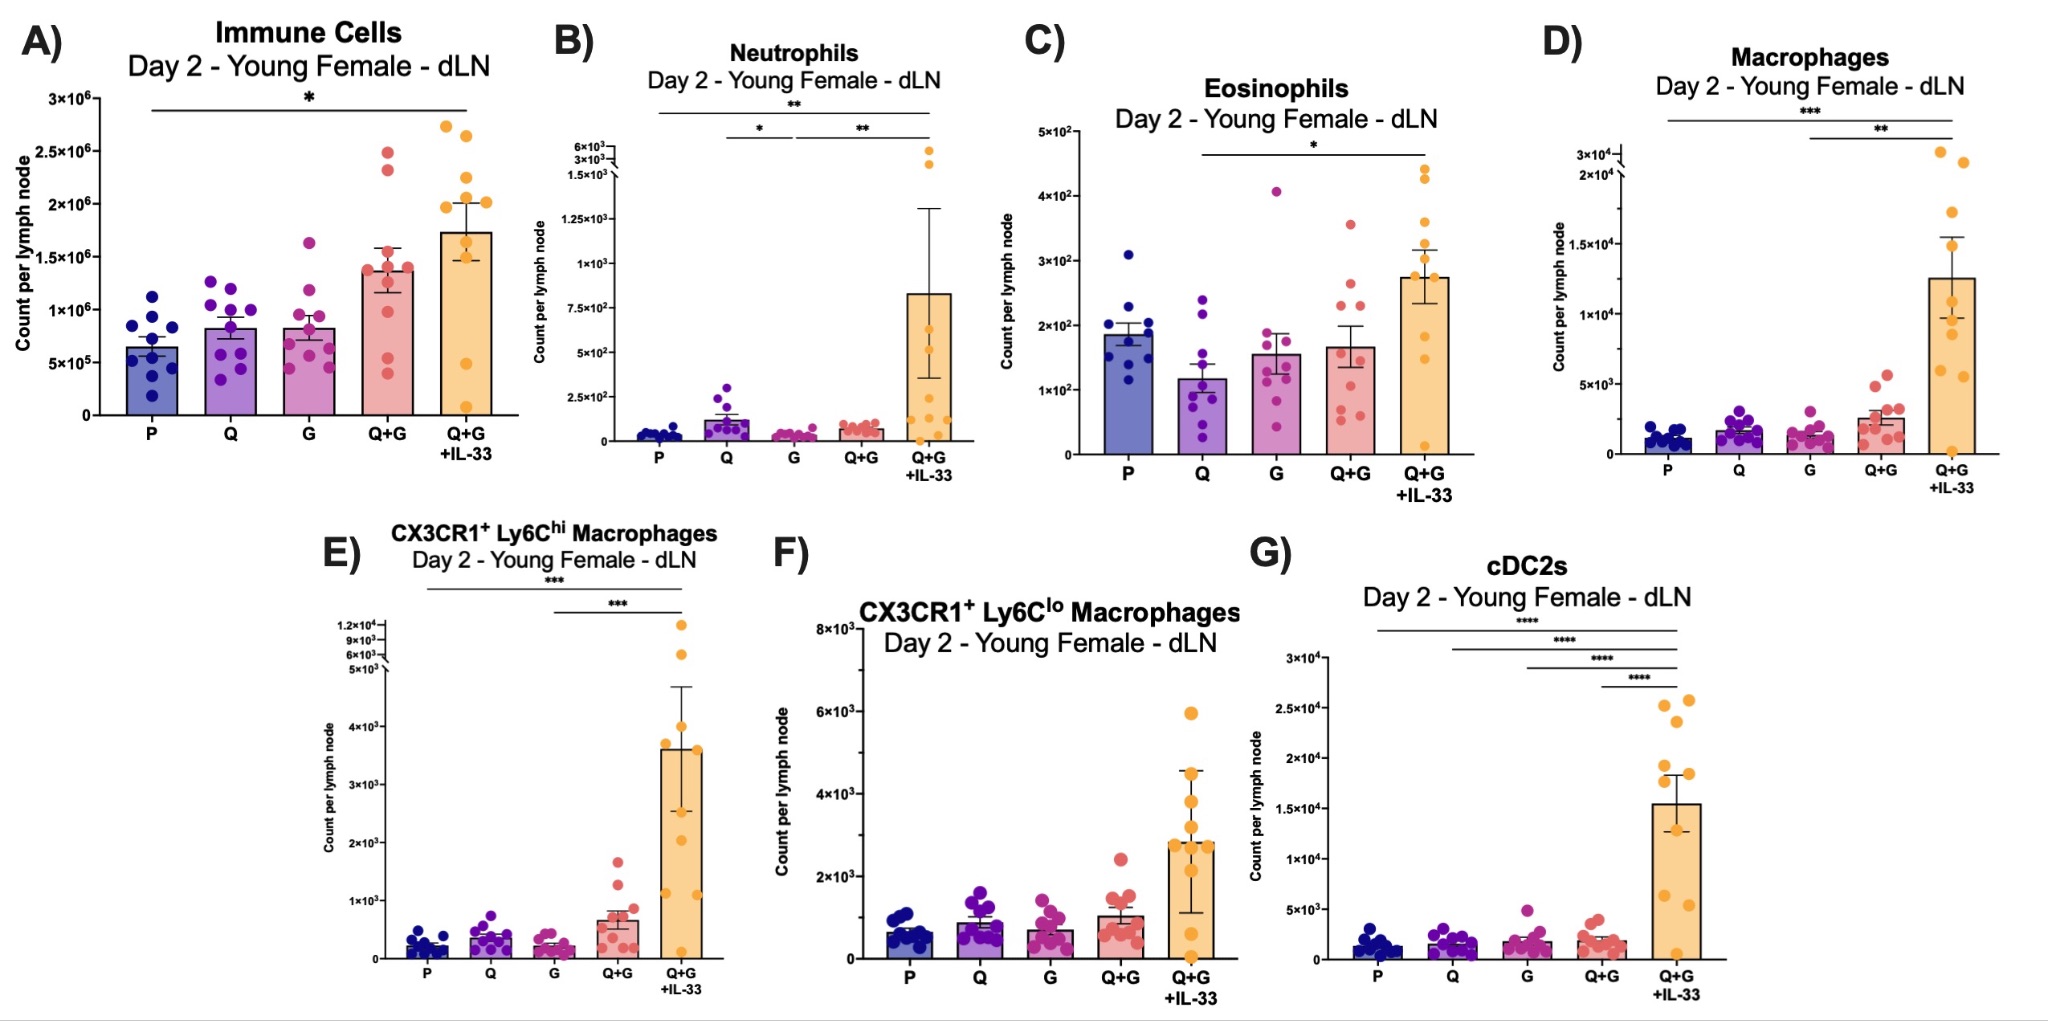
**

Supplementary Figure 7. **Immune characterization of draining inguinal lymph nodes using spectral flow cytometry on day 2 in female mice.** Count of non-circulating **(A)** total Immune cells, **(B)** neutrophils, **(C)** eosinophil, **(D)** macrophages, **(E)** CX3CR1+Ly6Chi macrophages, **(F)** CX3CR1+Ly6Clo macrophages, and **(G)** cDC2s in inguinal draining lymph nodes 2 days after injection with P, Q, G, Q+G, and Q+G+IL-33. * P ≤ 0.05 ** P ≤ 0.01 *** P ≤ 0.001 **** P ≤ 0.0001 (Kruskall-Wallis followed by Dunn’s multiple comparisons test).


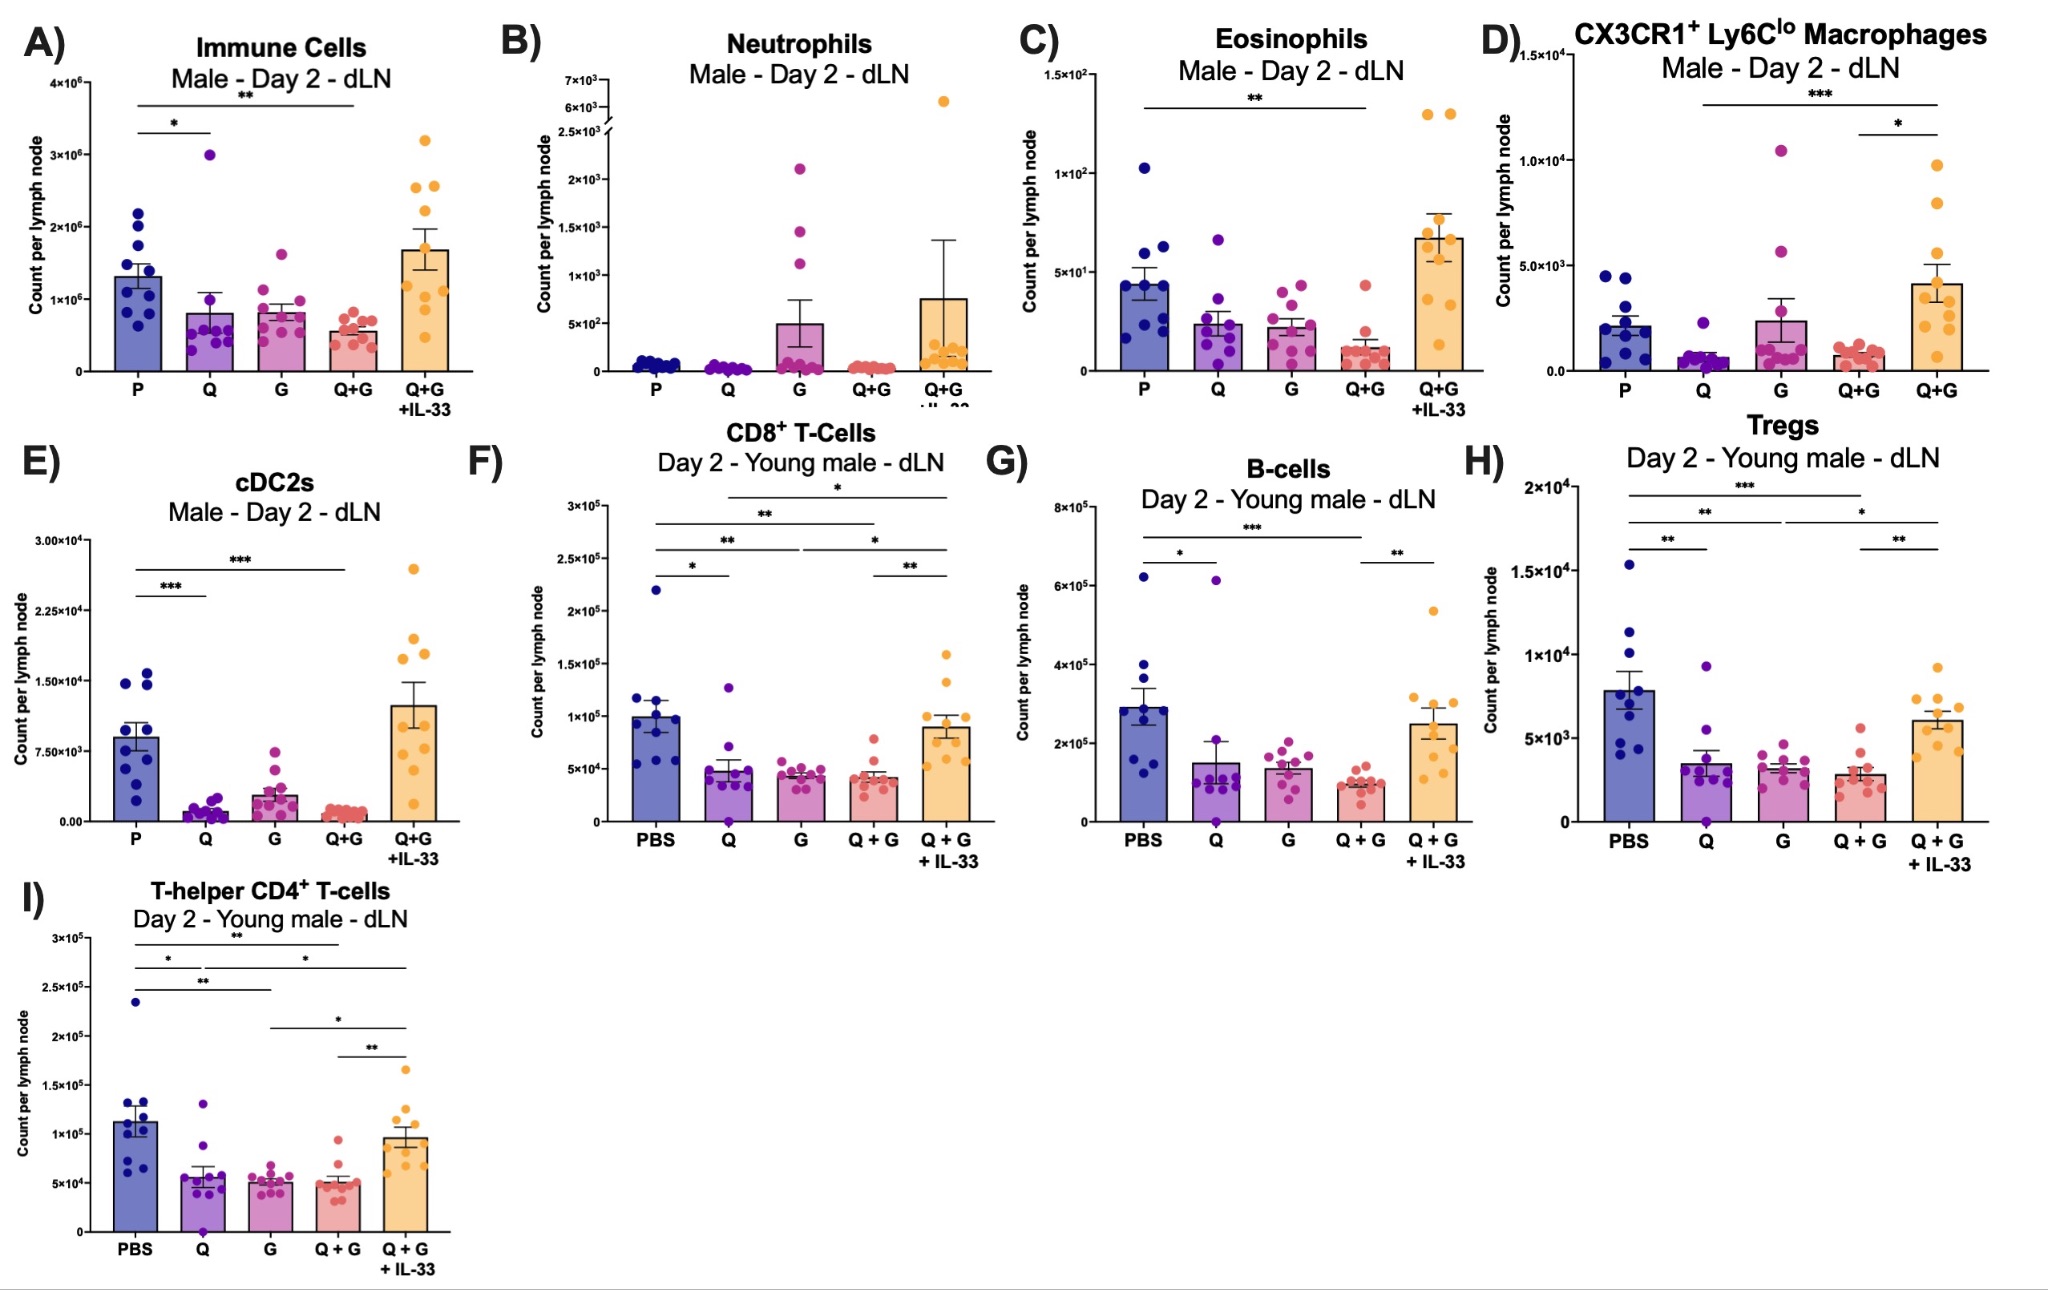


Supplementary Figure 8. **Immune characterization of draining inguinal lymph nodes using spectral flow cytometry on day 2 in male mice.** Count of non-circulating **(A)** total Immune cells, **(B)** neutrophils, **(C)** eosinophil, **(D)** CX3CR1+Ly6Clo macrophages, **(E) cDC2s**, **(F)** CD8+ T-cells, **(G)** B-cells, **(H)** Tregs, and **(I)** CD4+ T-helper cells in inguinal draining lymph nodes 2 days after injection with P, Q, G, Q+G, and Q+G+IL-33. * P ≤ 0.05 ** P ≤ 0.01 *** P ≤ 0.001 **** P ≤ 0.0001 (Kruskall-Wallis followed by Dunn’s multiple comparisons test).


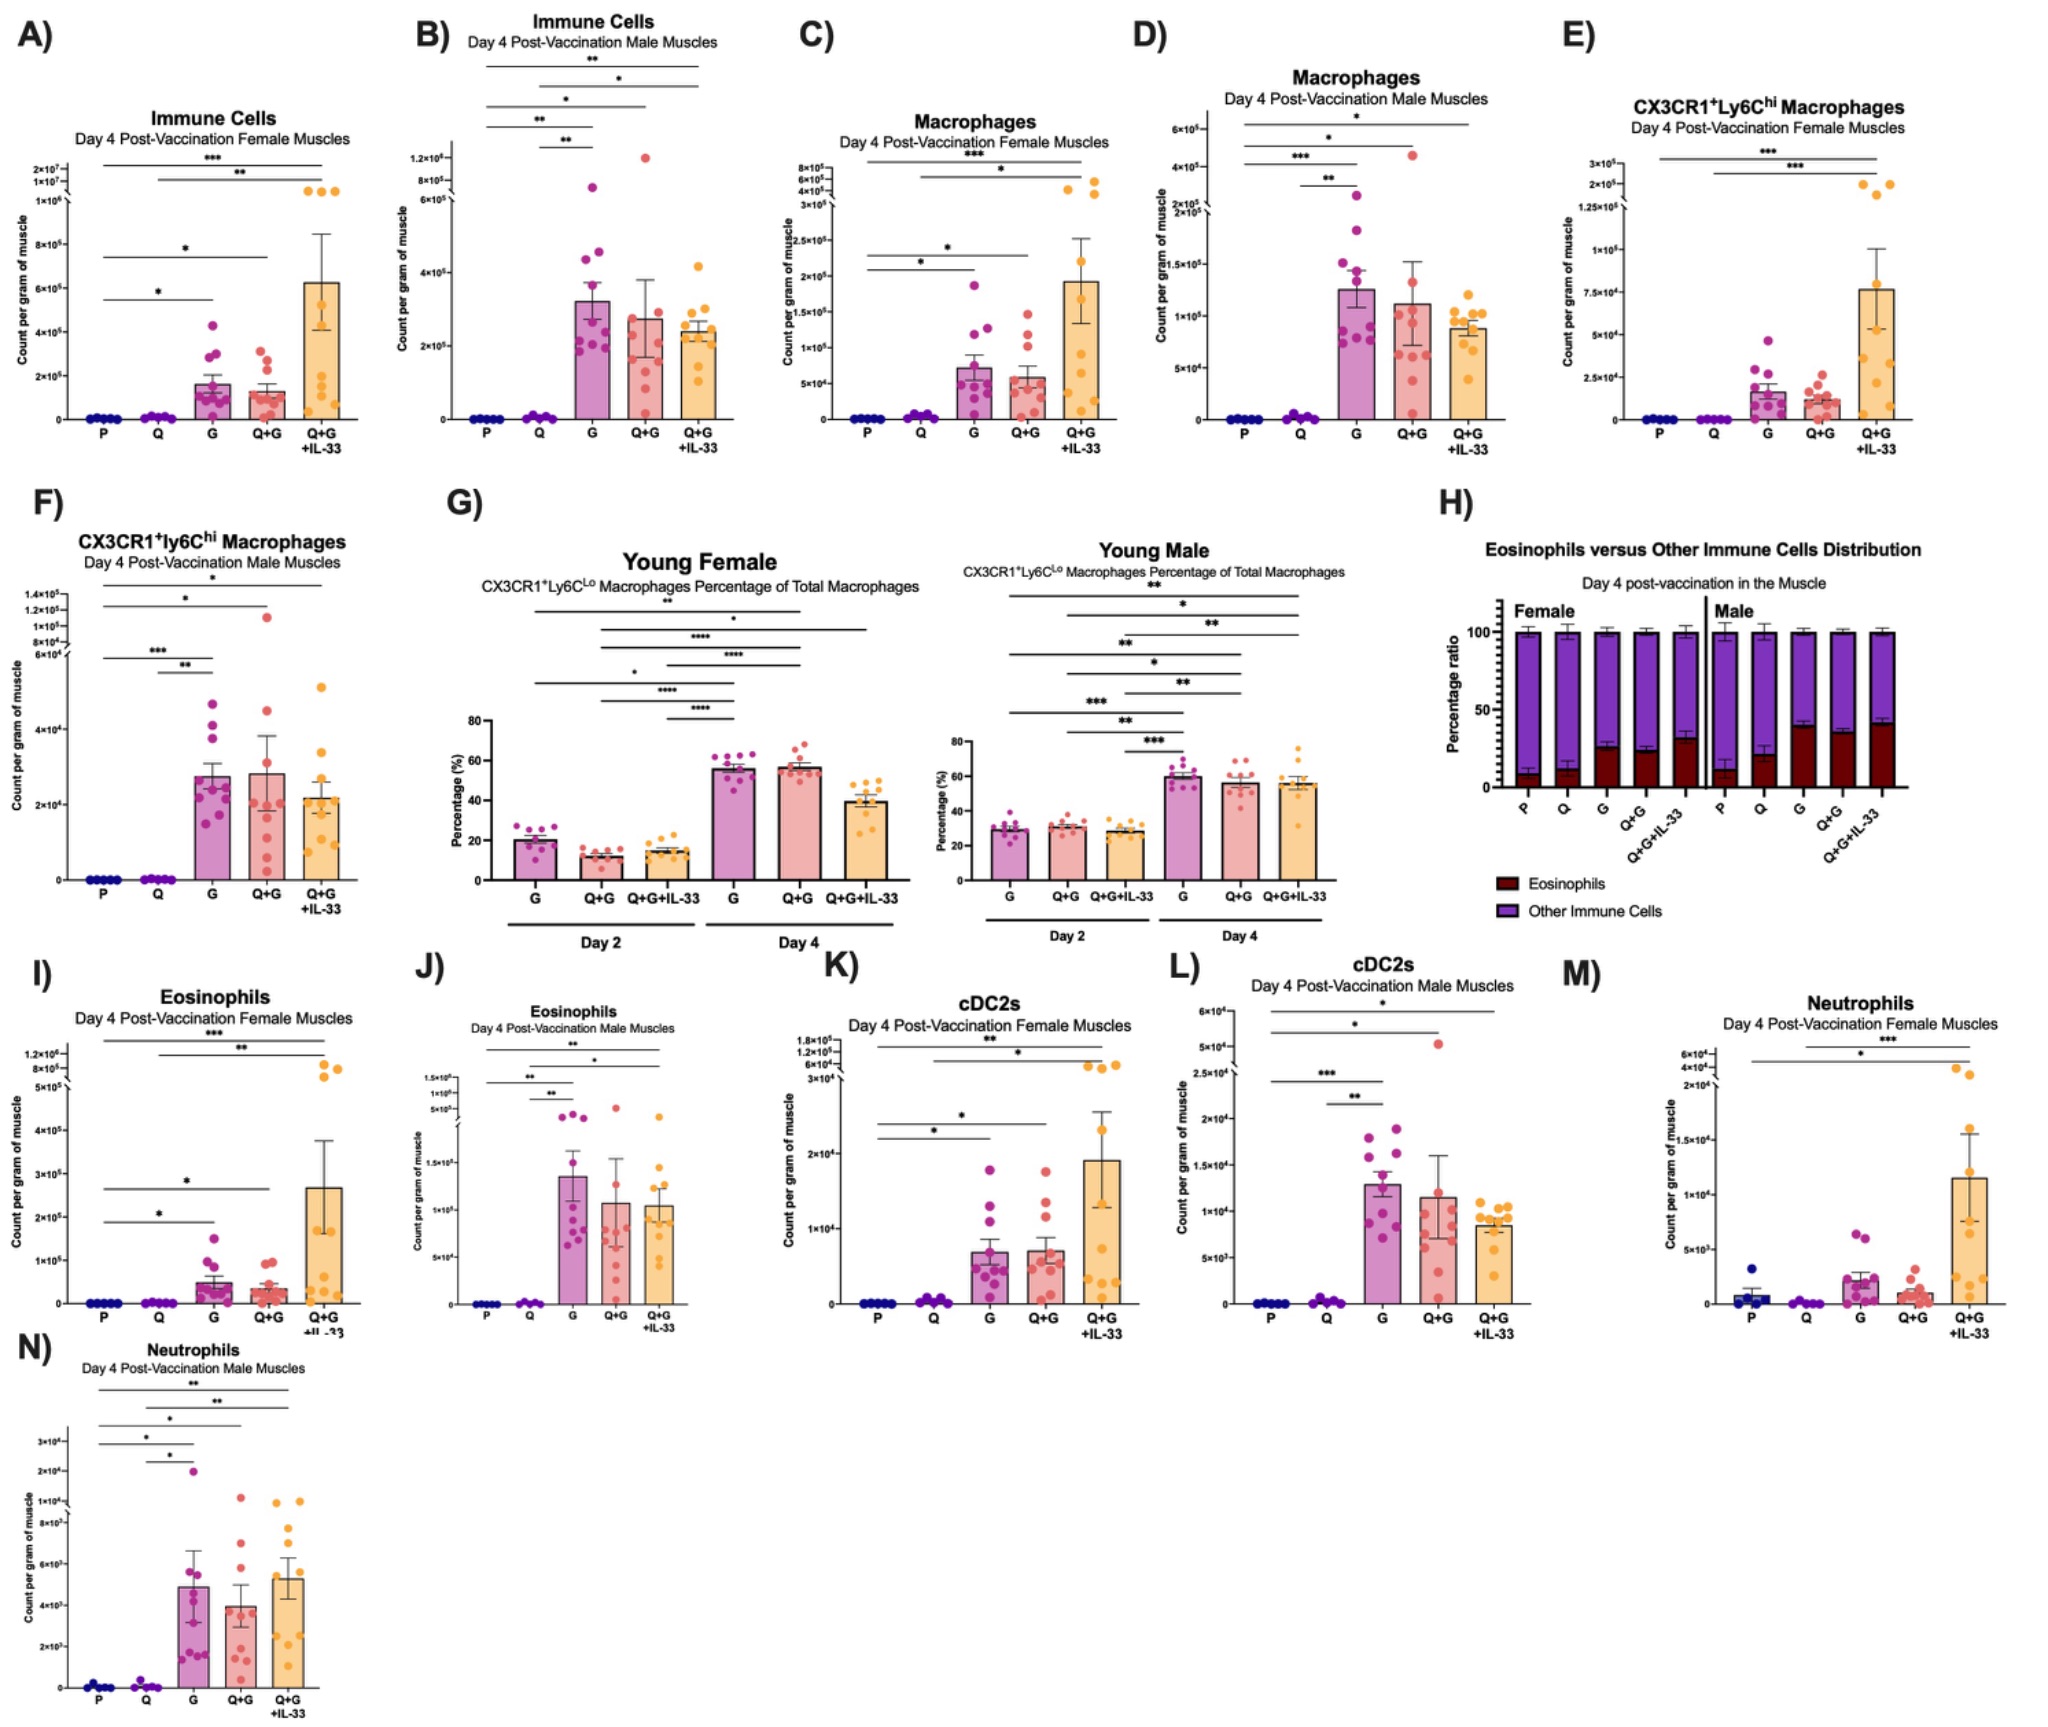


Supplementary Figure 9. **Immune characterization of quadricep myeloid cells and granulocytes using spectral flow cytometry on day 4 in young male and female mice.** Count of non-circulating **(A)** total immune cells in female quadriceps, **(B)** total immune cells in male quadriceps, **(C)** macrophages in female quadriceps, **(D)** macrophages in male quadriceps, **(E)** CX3CR1+Ly6Chi macrophages in female quadriceps, **(F)** CX3CR1+Ly6Chi macrophages in male quadriceps 4 days after injection with P, Q, G, Q+G, and Q+G+IL-33. **(G)** CX3CR1+Ly6Clo macrophages percentage of total macrophages in young female and male mice on days 2 and 4 in the G, Q+G and Q+G+IL-33 groups. **(H)** eosinophil to non-eosinophil immune distributions in day 4 young male and female quadriceps from P, Q, G, Q+G, and Q+G+IL-33 groups. Count of non-circulating **(I)** eosinophils in female quadriceps, **(J)** eosinophils in male quadriceps, **(K)** cDC2s in female quadriceps, **(L)** cDC2s in male quadriceps, **(M)** neutrophils in female quadriceps, **(N)** neutrophils in male quadriceps 4 days after injection with P, Q, G, Q+G, and Q+G+IL-33. * P ≤ 0.05 ** P ≤ 0.01 *** P ≤ 0.001 **** P ≤ 0.0001 (Kruskall-Wallis followed by Dunn’s multiple comparisons test).


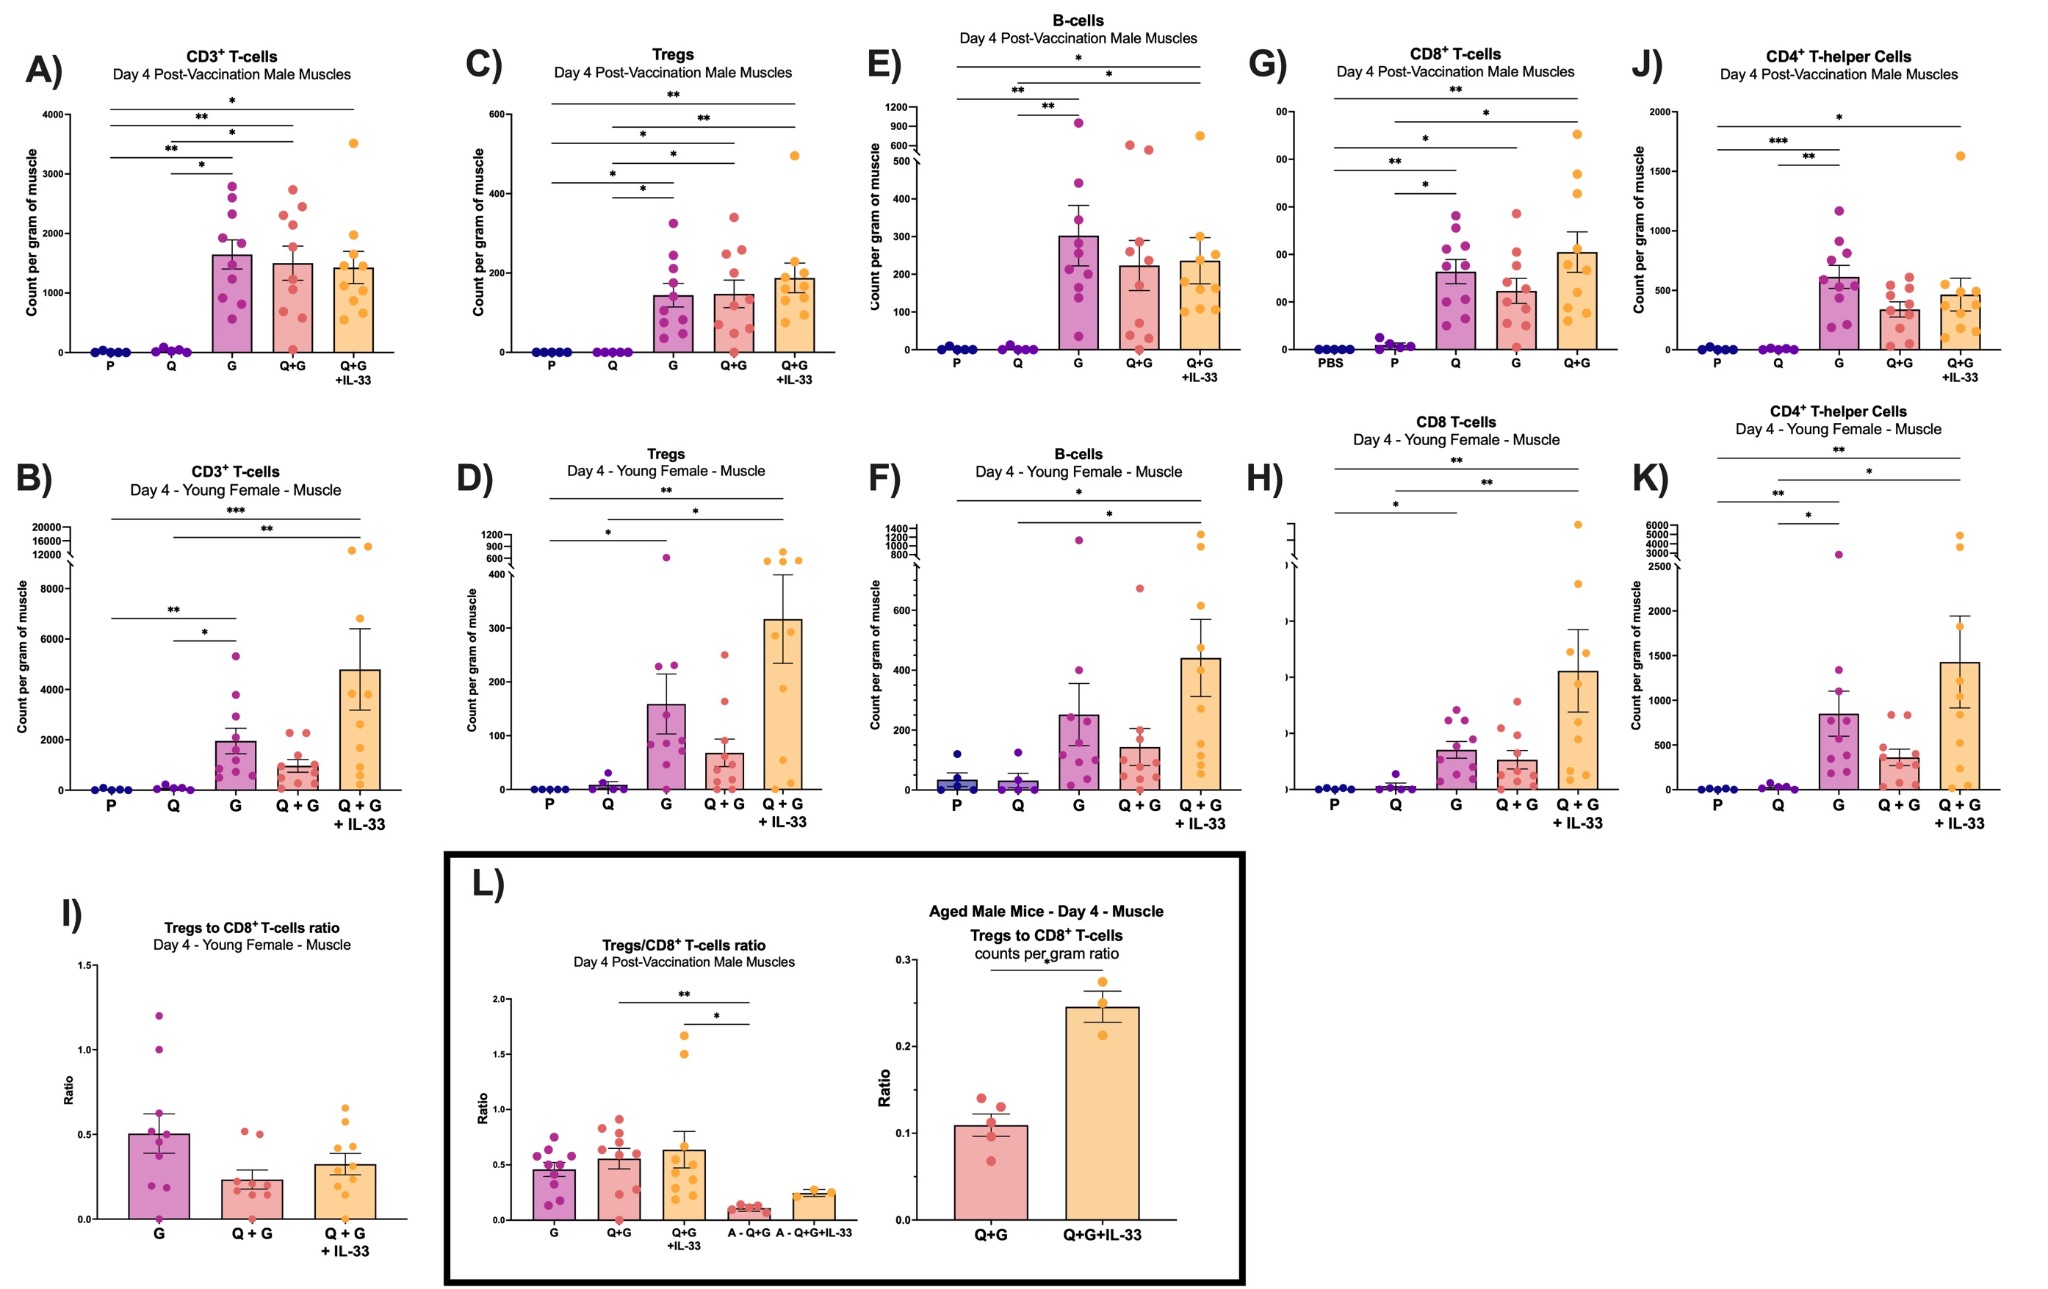


Supplementary Figure 10. **Immune characterization of quadricep lymphocytes using spectral flow cytometry on day 4 in young male and female mice.** Count of non-circulating **(A)** CD3+ T-cells, **(C)** Tregs, **(E)** B-cells, **(I)** CD8+ T-cells, **(K)** and CD4+ T-helper cells, in male quadriceps 4 days after injection with P, Q, G, Q+G, and Q+G+IL-33. Count of non-circulating **(B)** CD3+ T-cells, **(D)** Tregs, **(F)** B-cells, **(H)** CD8+ T-cells, **(K)** and CD4+ T-helper cells in young femalequadriceps 4 days after injection with P, Q, G, Q+G, and Q+G+IL-33. **(I)** Treg:CD8+ T-cell ratio in day 4 female quadriceps from G, Q+G, and Q+G+IL-33 groups. **(L)** Tregs to CD8+ T-cells ratio in young and aged male mice on day 4 in the young G, Q+G and Q+G+IL-33 groups, and the aged Q+G and Q+G+IL-33 groups. * P ≤ 0.05 ** P ≤ 0.01 *** P ≤ 0.001 **** P ≤ 0.0001 (Kruskall-Wallis followed by Dunn’s multiple comparisons test).


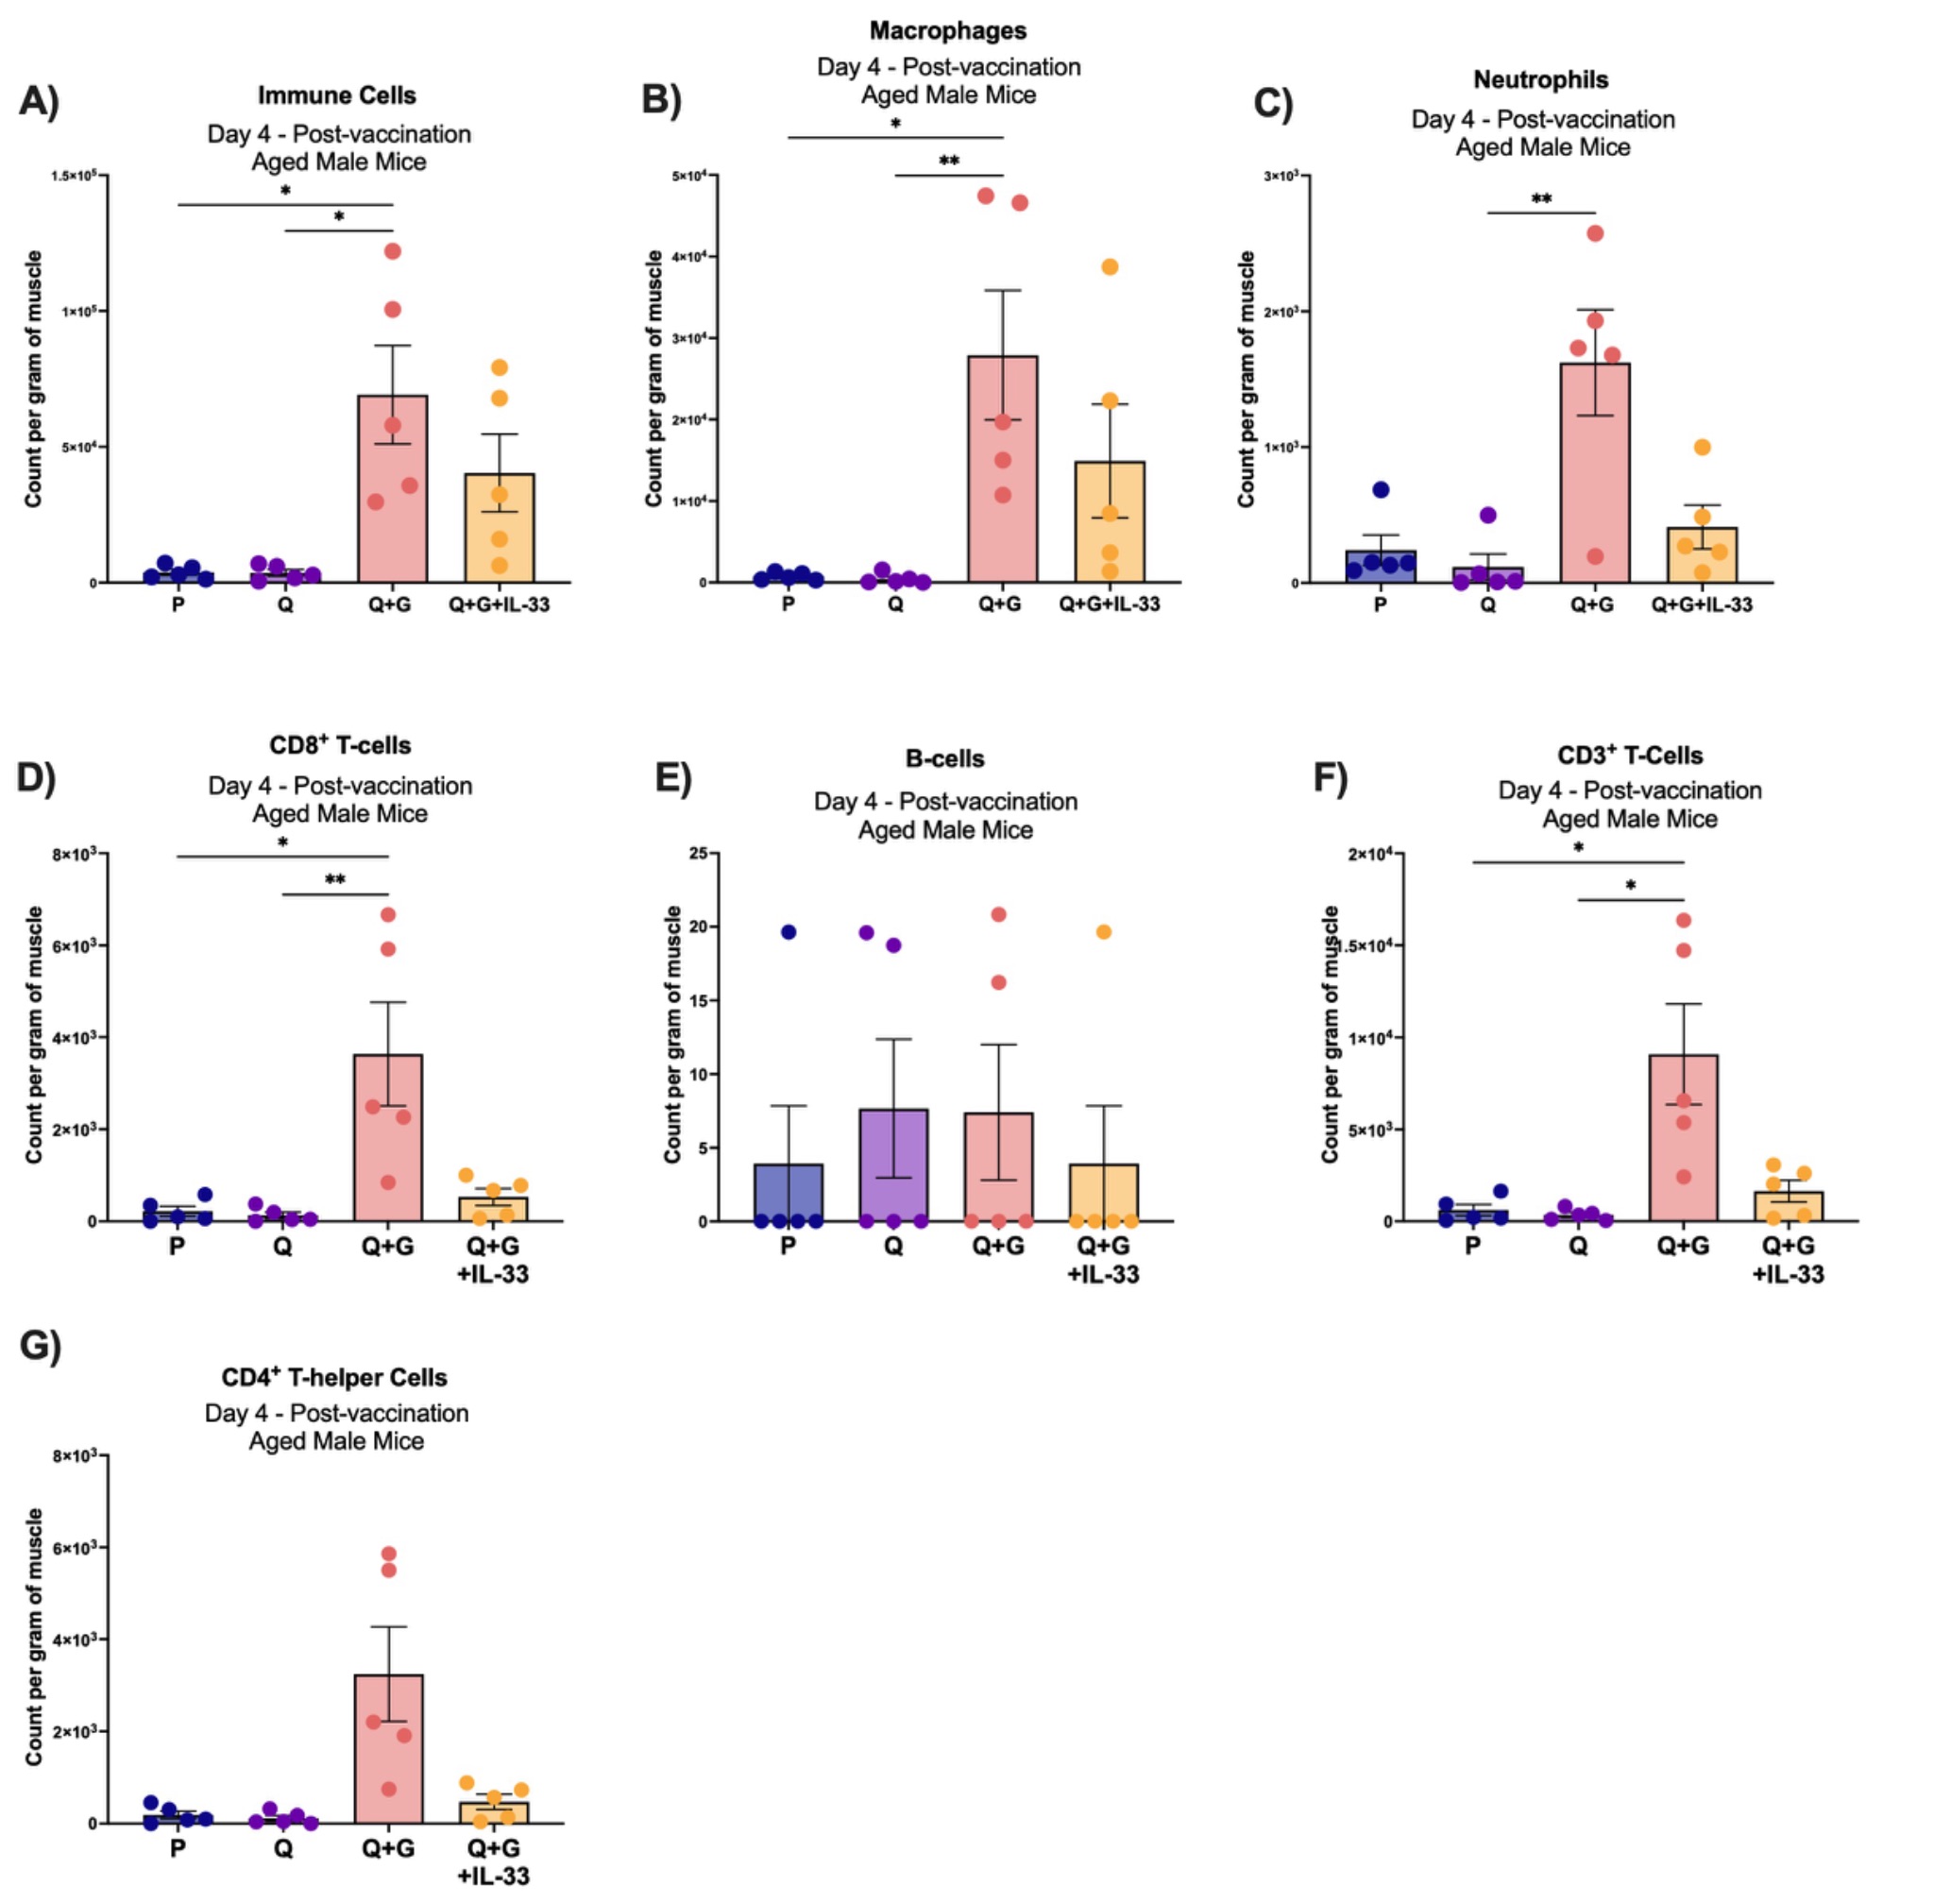


Supplementary Figure 11. **Immune characterization of quadricep immune cells using spectral flow cytometry on day 4 in aged male mice.** Count of non-circulating **(A)** Immune cells, **(B)** macrophages, **(C)** neutrophils, **(D)** CD8+ T-cells, **(E)** B-cells, **(F)** CD3+ T-cells, and **(G)** CD4+ T-helper cells in aged male quadriceps 4 days after injection with P, Q, G, Q+G, and Q+G+IL-33. * P ≤ 0.05 ** P ≤ 0.01 *** P ≤ 0.001 **** P ≤ 0.0001 (Kruskall-Wallis followed by Dunn’s multiple comparisons test).


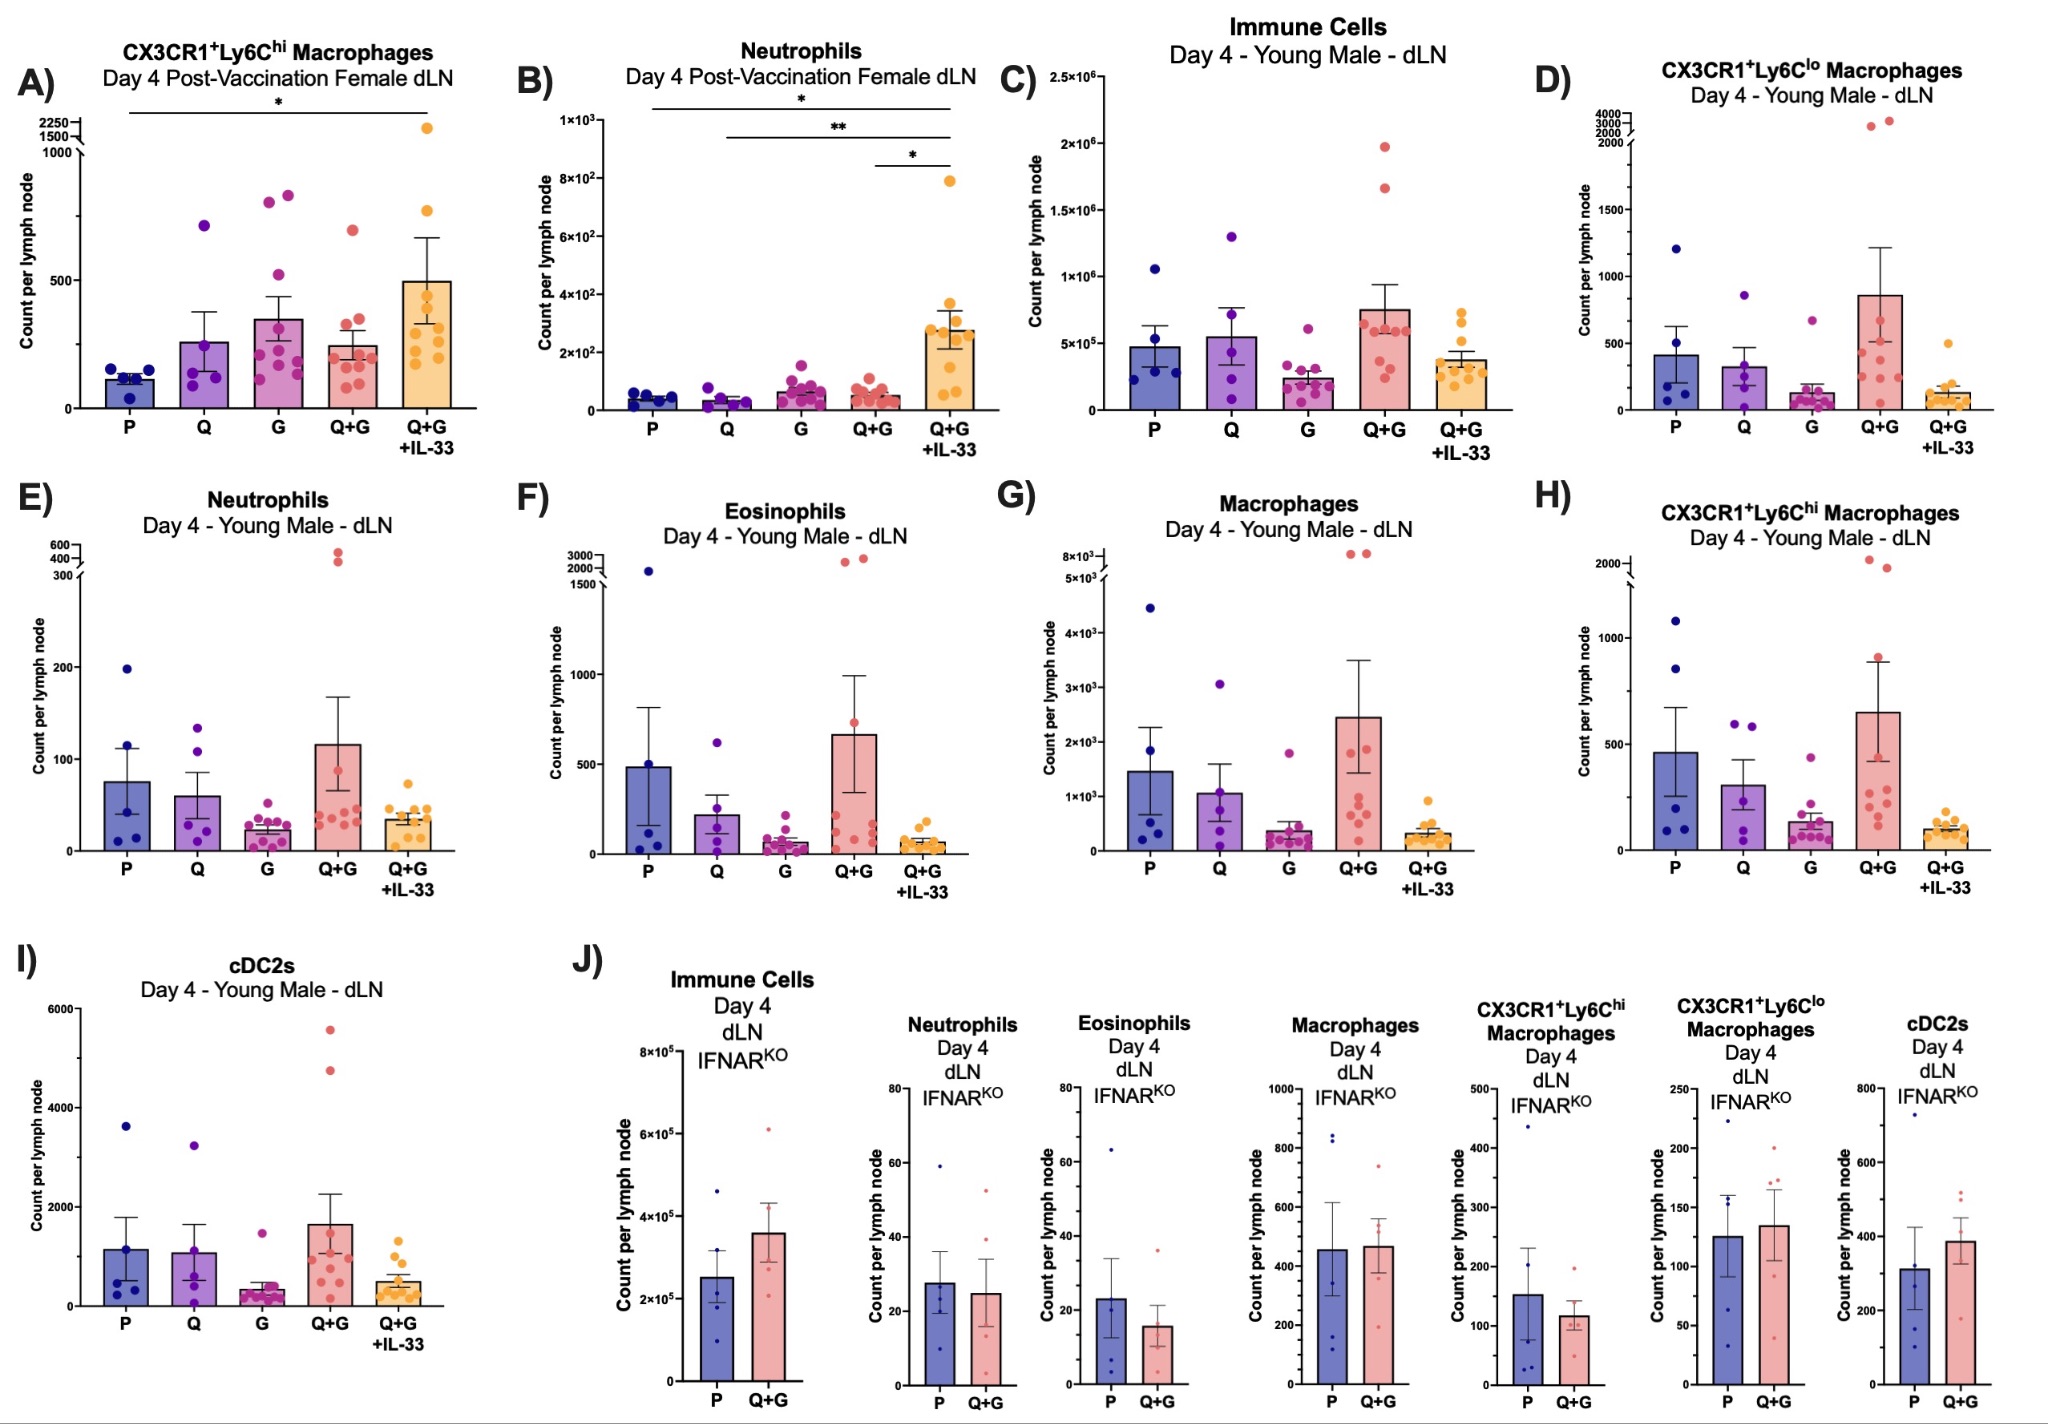


Supplementary Figure 12. **Immune characterization of draining lymph node myeloid cells and granulocytes using spectral flow cytometry on day 4 in young male and female mice and IFNAR-/- female mice.** Count of non-circulating **(A)** CX3CR1+Ly6Chi macrophages, and **(B)** neutrophils in young female mice draining lymph nodes 4 days after injection with P, Q, G, Q+G, and Q+G+IL-33. Count of non-circulating **(C)** Immune cells, **(D)** CX3CR1+Ly6Clo macrophages, **(E)** neutrophils, **(F)** eosinophils, **(G)** macrophages, **(H)** CX3CR1+Ly6Chi macrophages, and **(I)** cDC2s in young male draining lymph nodes 4 days after injection with P, Q, G, Q+G, and Q+G+IL-33. **(J)** Count of non-circulating immune cells, neutrophils, eosinophils, macrophages, CX3CR1+Ly6Chi macrophages, CX3CR1+Ly6Clo macrophages, and cDC2s in IFNAR-/- female draining lymph nodes 4 days after P and Q+G. * P ≤ 0.05 ** P ≤ 0.01 *** P ≤ 0.001 **** P ≤ 0.0001 (Kruskall-Wallis followed by Dunn’s multiple comparisons test).


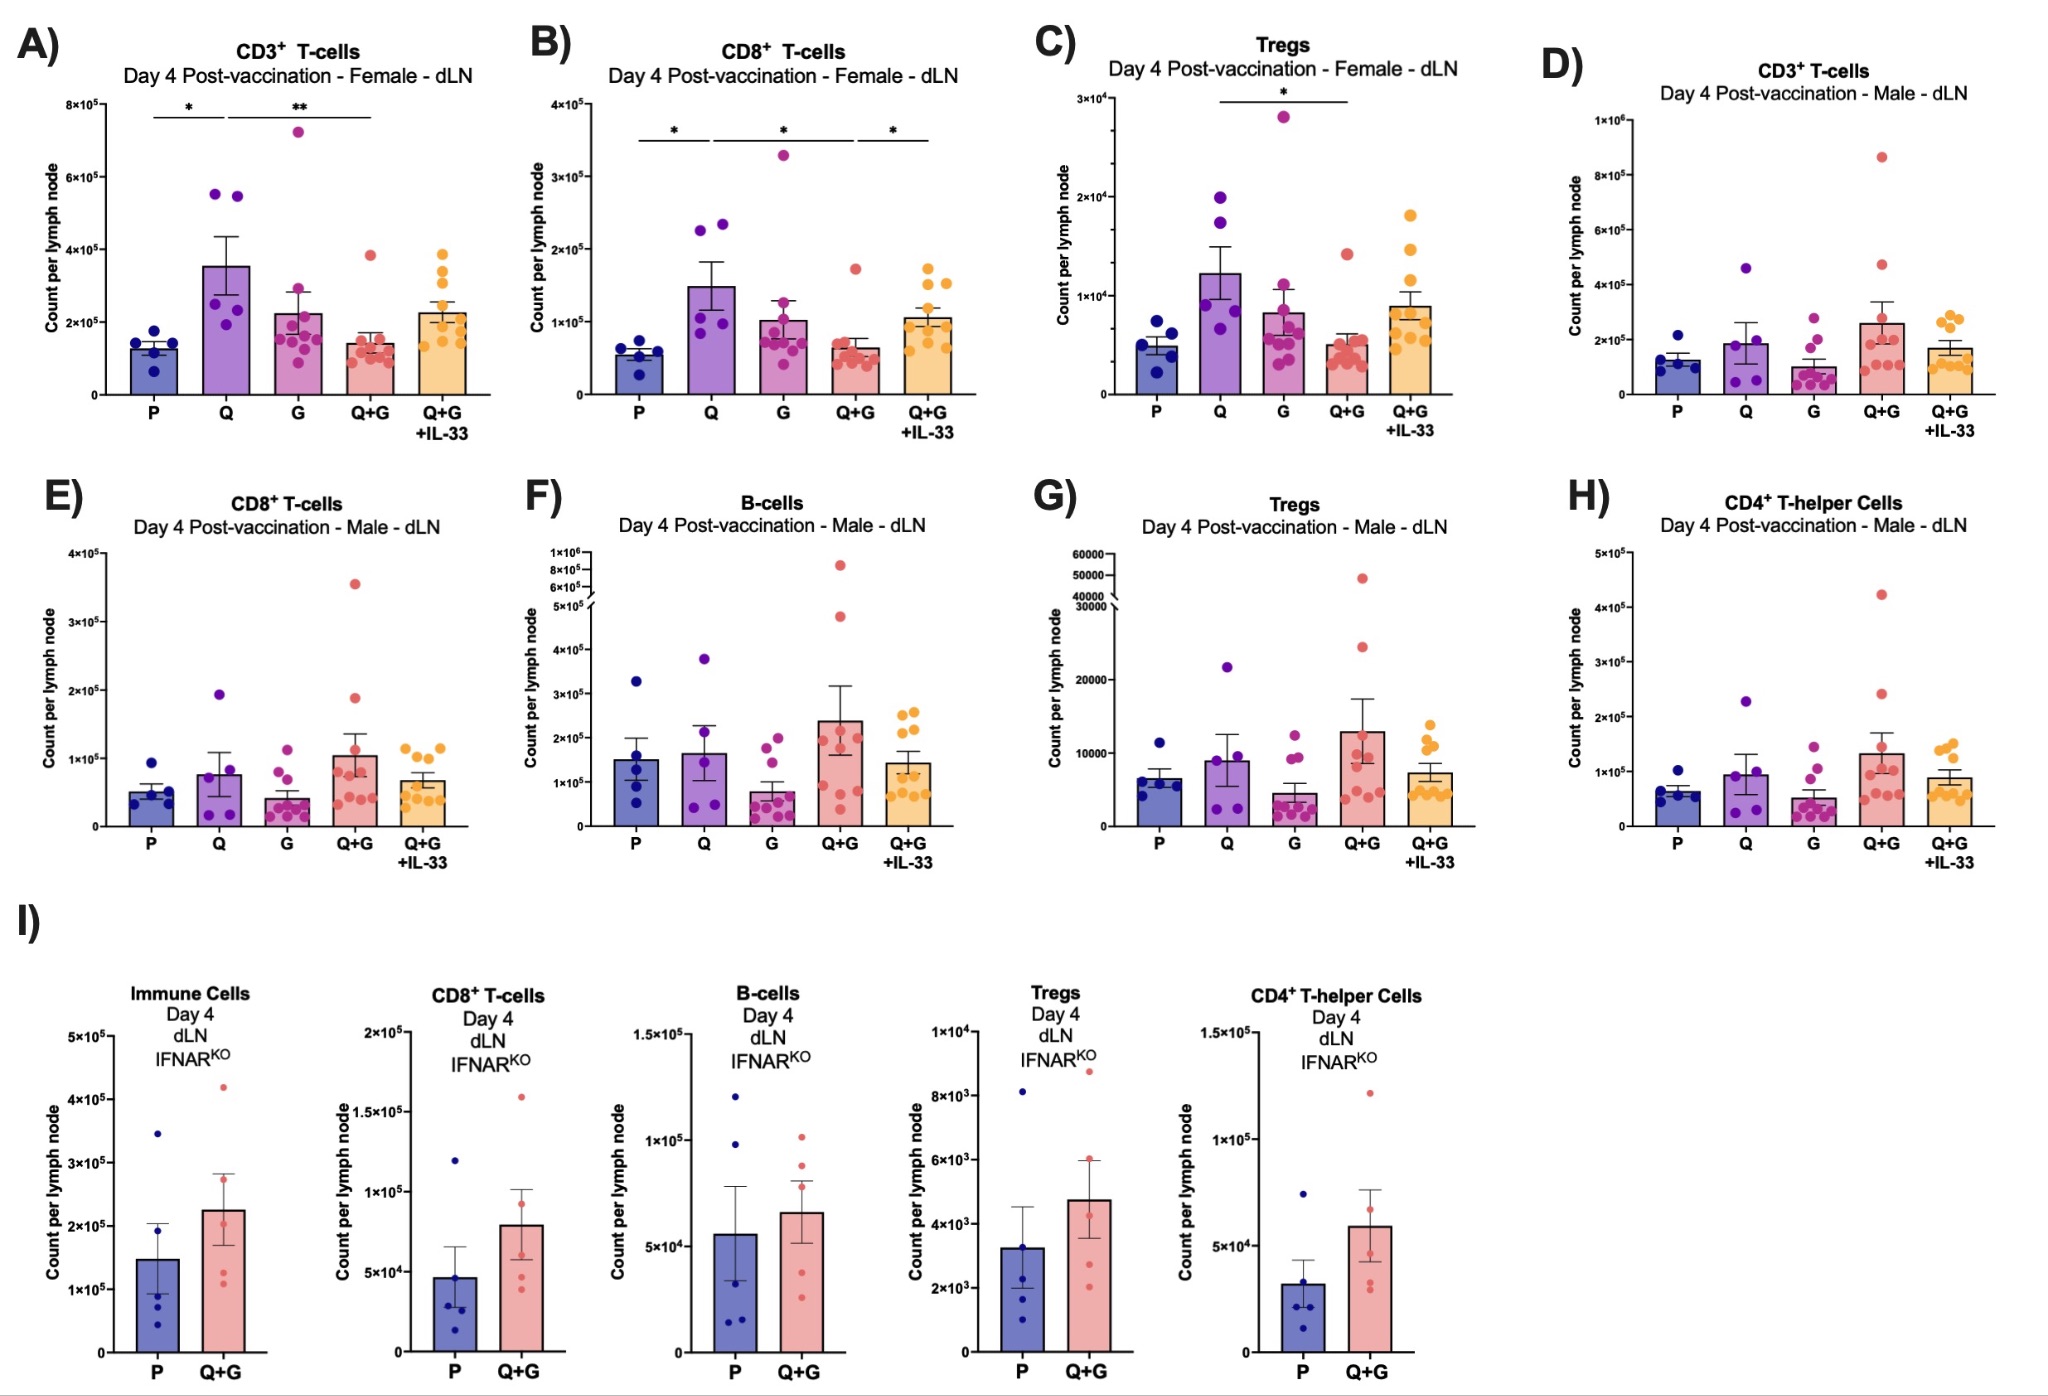


Supplementary Figure 13. **Immune characterization of draining lymph node lymphocytes using spectral flow cytometry on day 4 in young male and female mice and IFNAR-/- female mice.** Count of non-circulating **(A)** CD3+ T-cells, **(B)** CD8+ T-cells, and **(C)** Tregs in young female mice draining lymph nodes 4 days after injection with P, Q, G, Q+G, and Q+G+IL-33. Count of non-circulating **(D)** CD3+ T-cells, **(E)** CD8+ T-cells, and **(F)** B-cells, **(G)** Tregs, and **(H)** CD4+ T-helper cells in young male draining lymph nodes 4 days after injection with P, Q, G, Q+G, and Q+G+IL-33. **(J)** Count of non-circulating immune cells, CD8+ T-cells, B-cells, Tregs, and CD4+ T-helper cells in IFNAR-/- female draining lymph nodes 4 days after P and Q+G. * P ≤ 0.05 ** P ≤ 0.01 *** P ≤ 0.001 **** P ≤ 0.0001 (Kruskall-Wallis followed by Dunn’s multiple comparisons test).


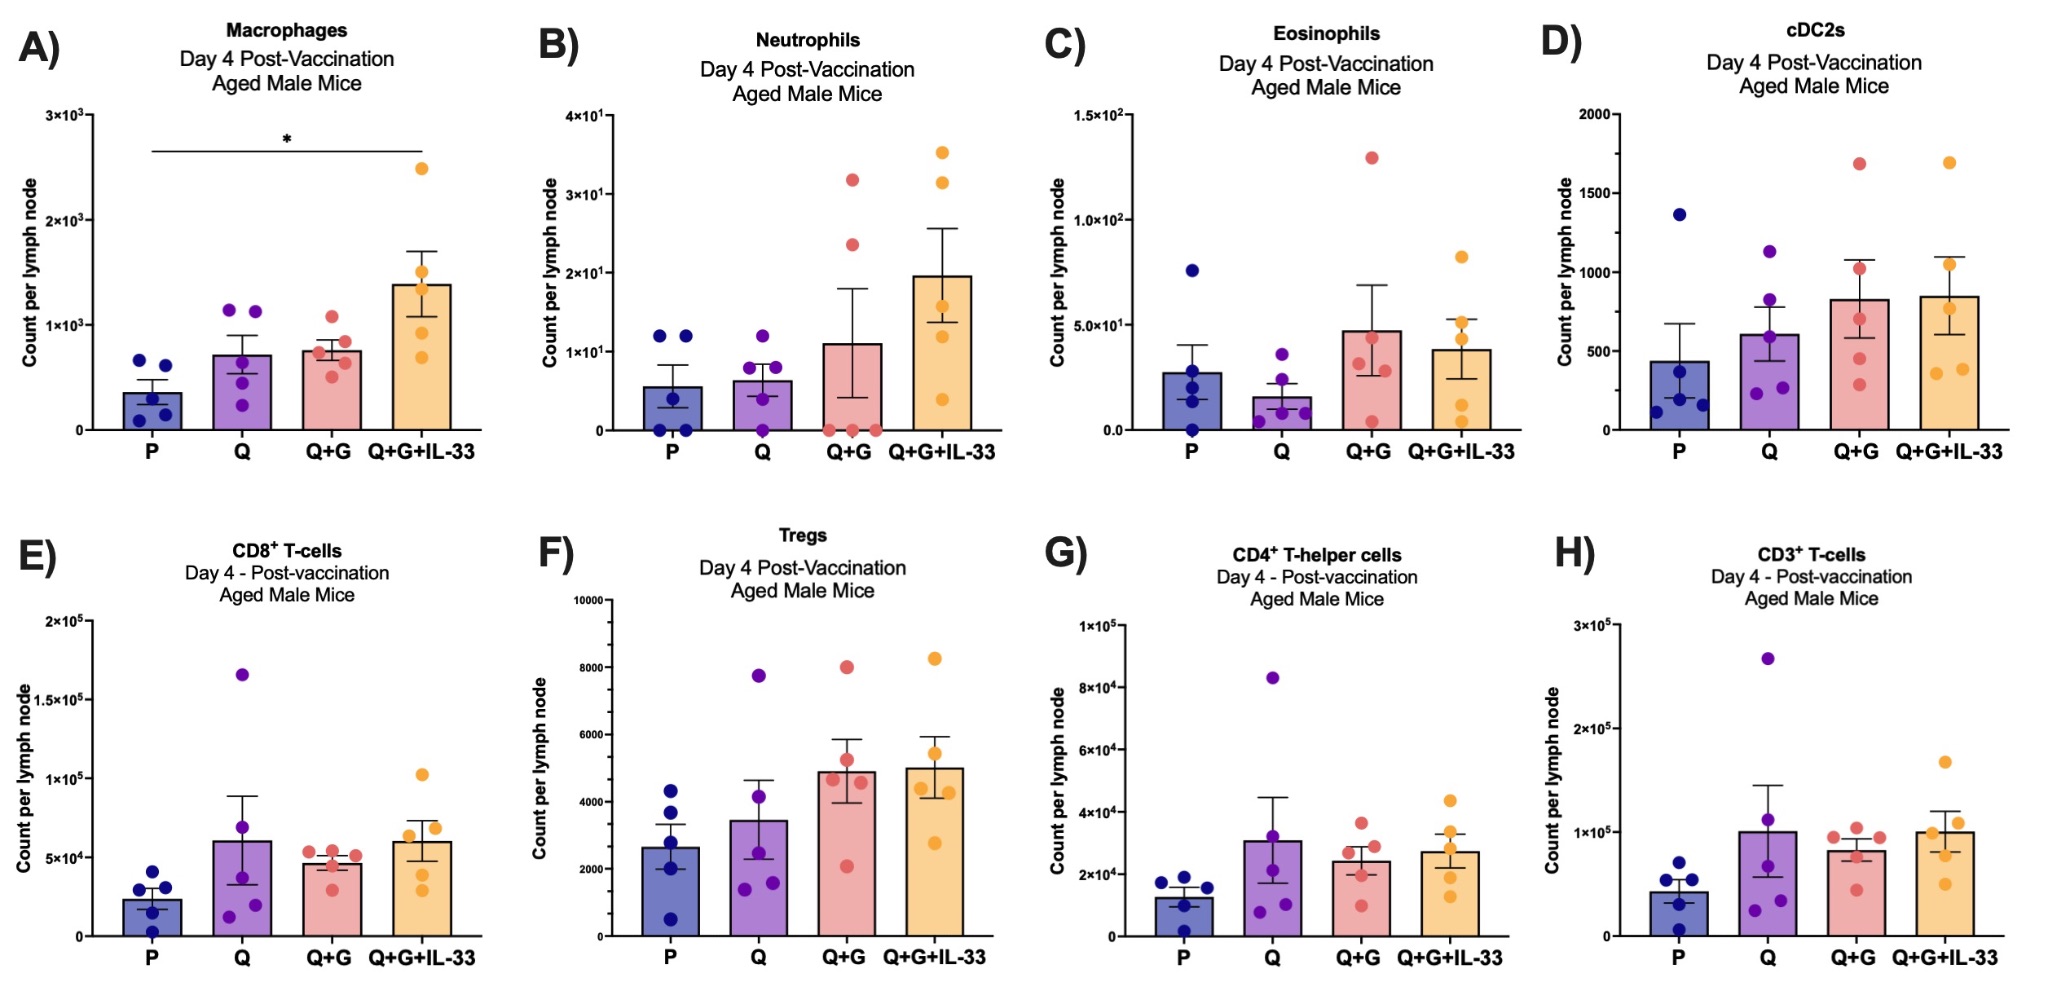


Supplementary Figure 14. **Immune characterization of draining lymph nodes using spectral flow cytometry on day 4 in aged male mice.** Count of non-circulating **(A)** macrophages, **(B)** neutrophils, **(C)** eosinophils, **(D)** cDC2s, **(E)** CD8+ T-cells, **(F)** Tregs,**(G)** CD4+ T-helper cells, and **(H)** CD3+ T-cells in aged male draining lymph nodes 4 days after injection with P, Q, G, Q+G, and Q+G+IL-33. * P ≤ 0.05 ** P ≤ 0.01 *** P ≤ 0.001 **** P ≤ 0.0001 (Kruskall-Wallis followed by Dunn’s multiple comparisons test).


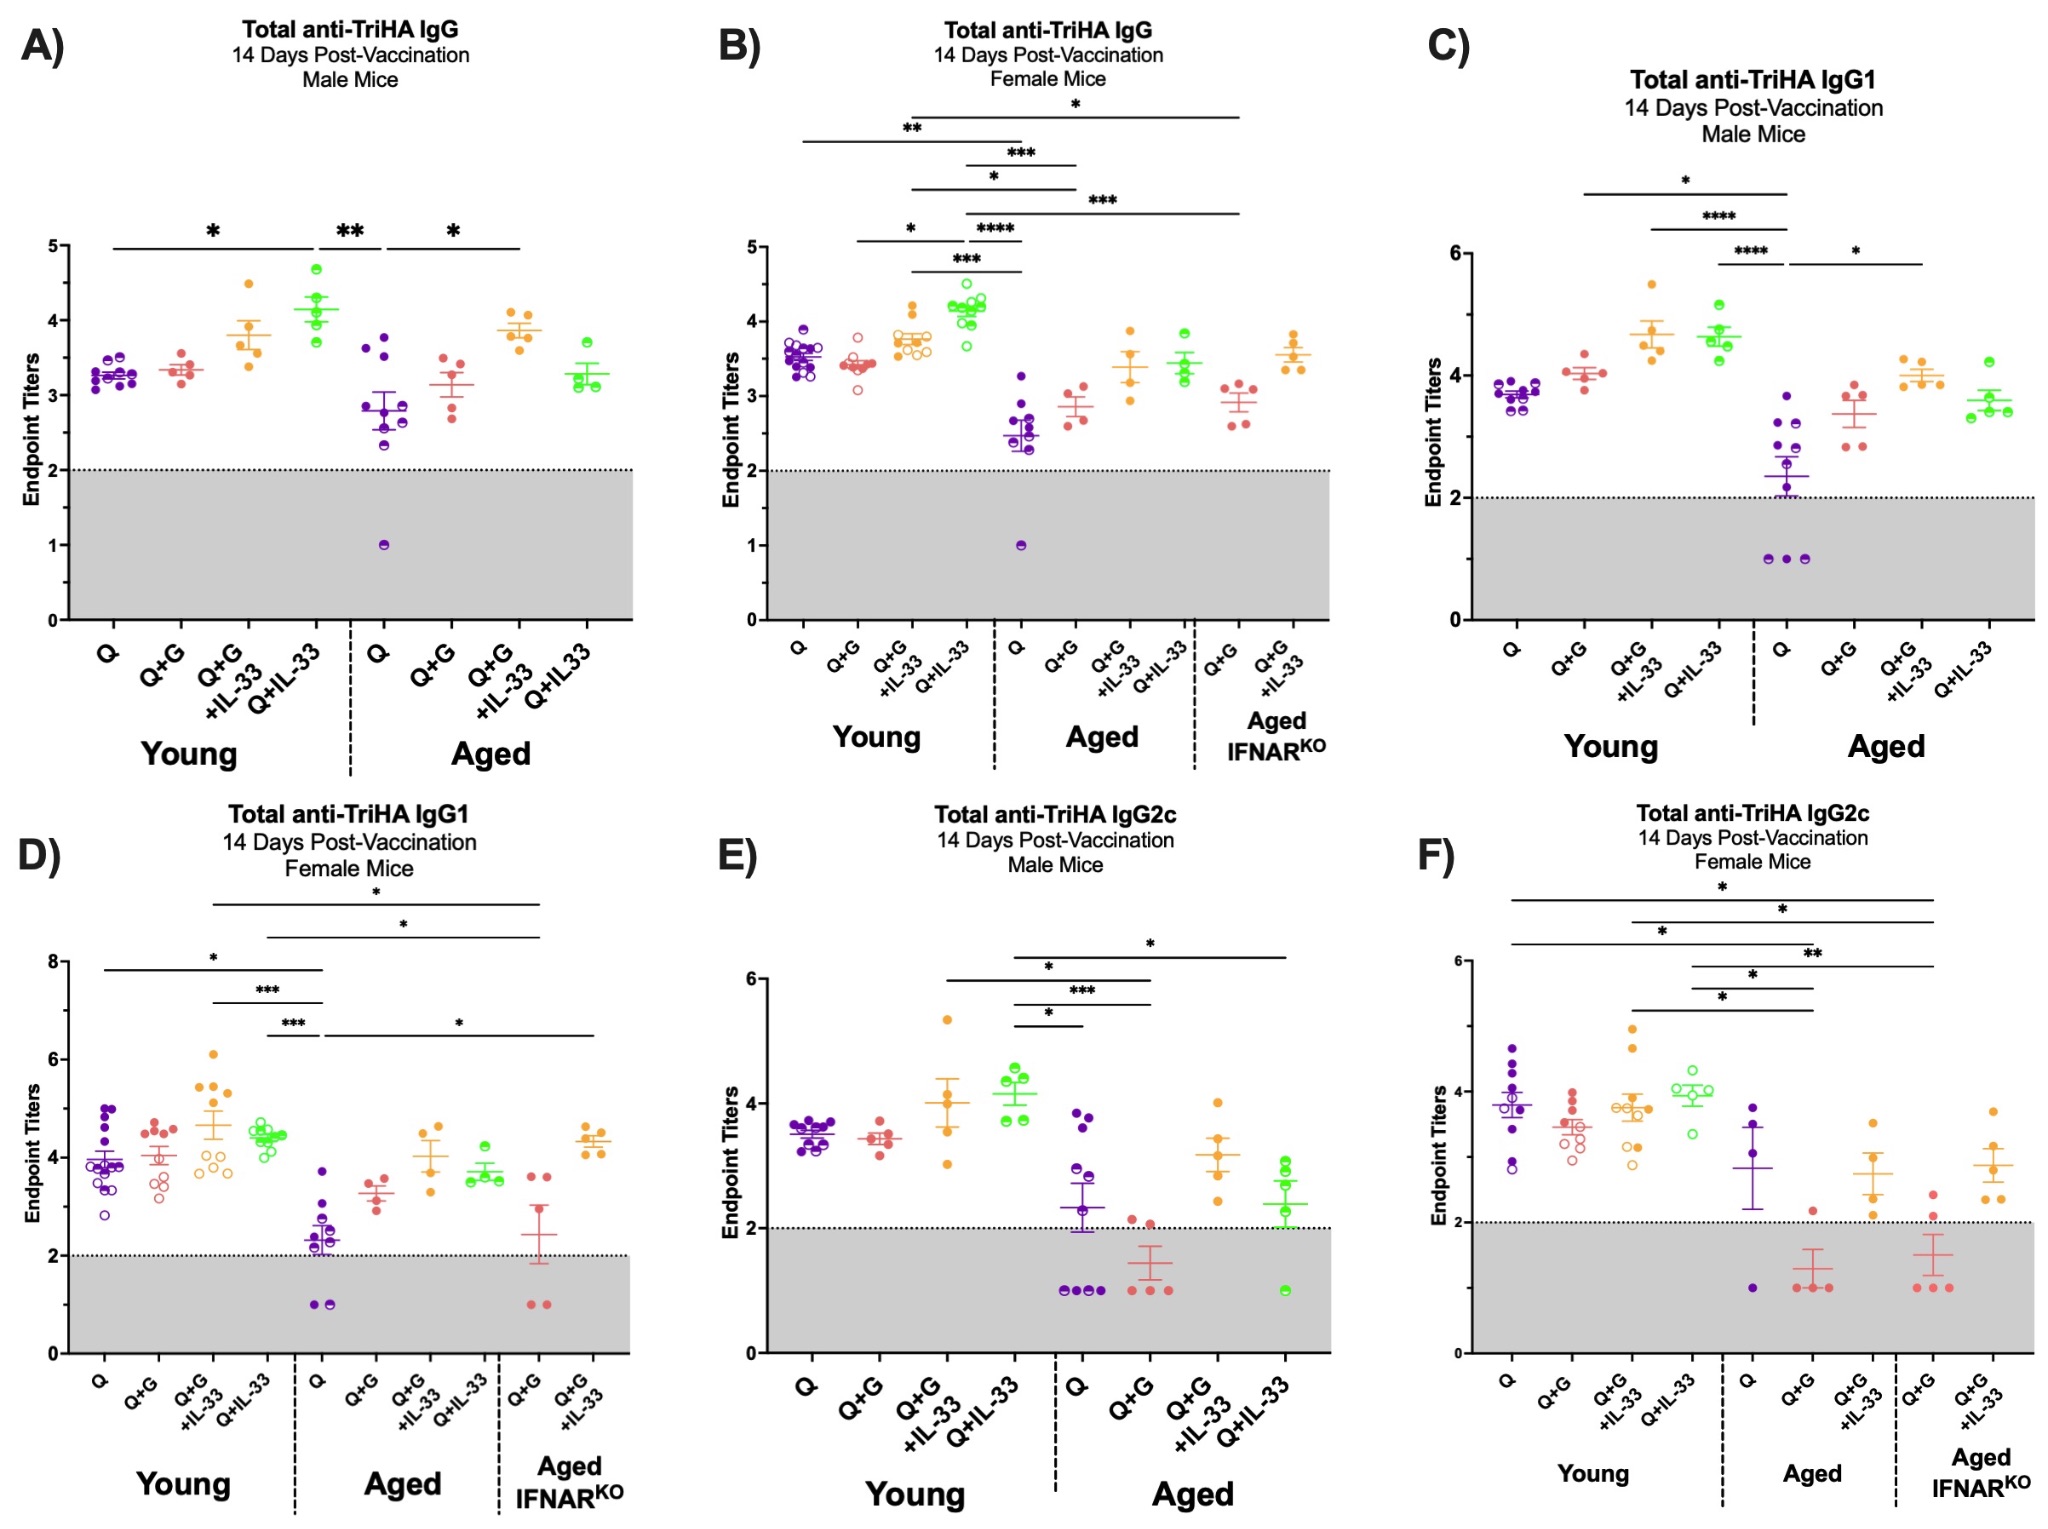


Supplementary Figure 15. **Serological** **anti-TriHA log10 Antibody titers of all mice 14 days following vaccination.** **(A)** Quantification of anti-TriHA total IgG antibody endpoint titers on day 14 after vaccination in young and aged male mice; **(B)** in young, aged Wildtype, and aged IFNAR⁻/⁻ female mice; **(C)** Quantification of anti-TriHA total IgG1 antibody endpoint titers on day 14 after vaccination in young and aged male mice; **(D)** in young, aged Wildtype, and aged IFNAR⁻/⁻ female mice. (**E)** Quantification of anti-TriHA total IgG2c antibody endpoint titers on day 14 after vaccination in young and aged male mice; **(F)** in young, aged Wildtype, and aged IFNAR⁻/⁻ female mice. * P ≤ 0.05 ** P ≤ 0.01 *** P ≤ 0.001 **** P ≤ 0.0001 (Kruskall-Wallis followed by Dunn’s multiple comparisons test).


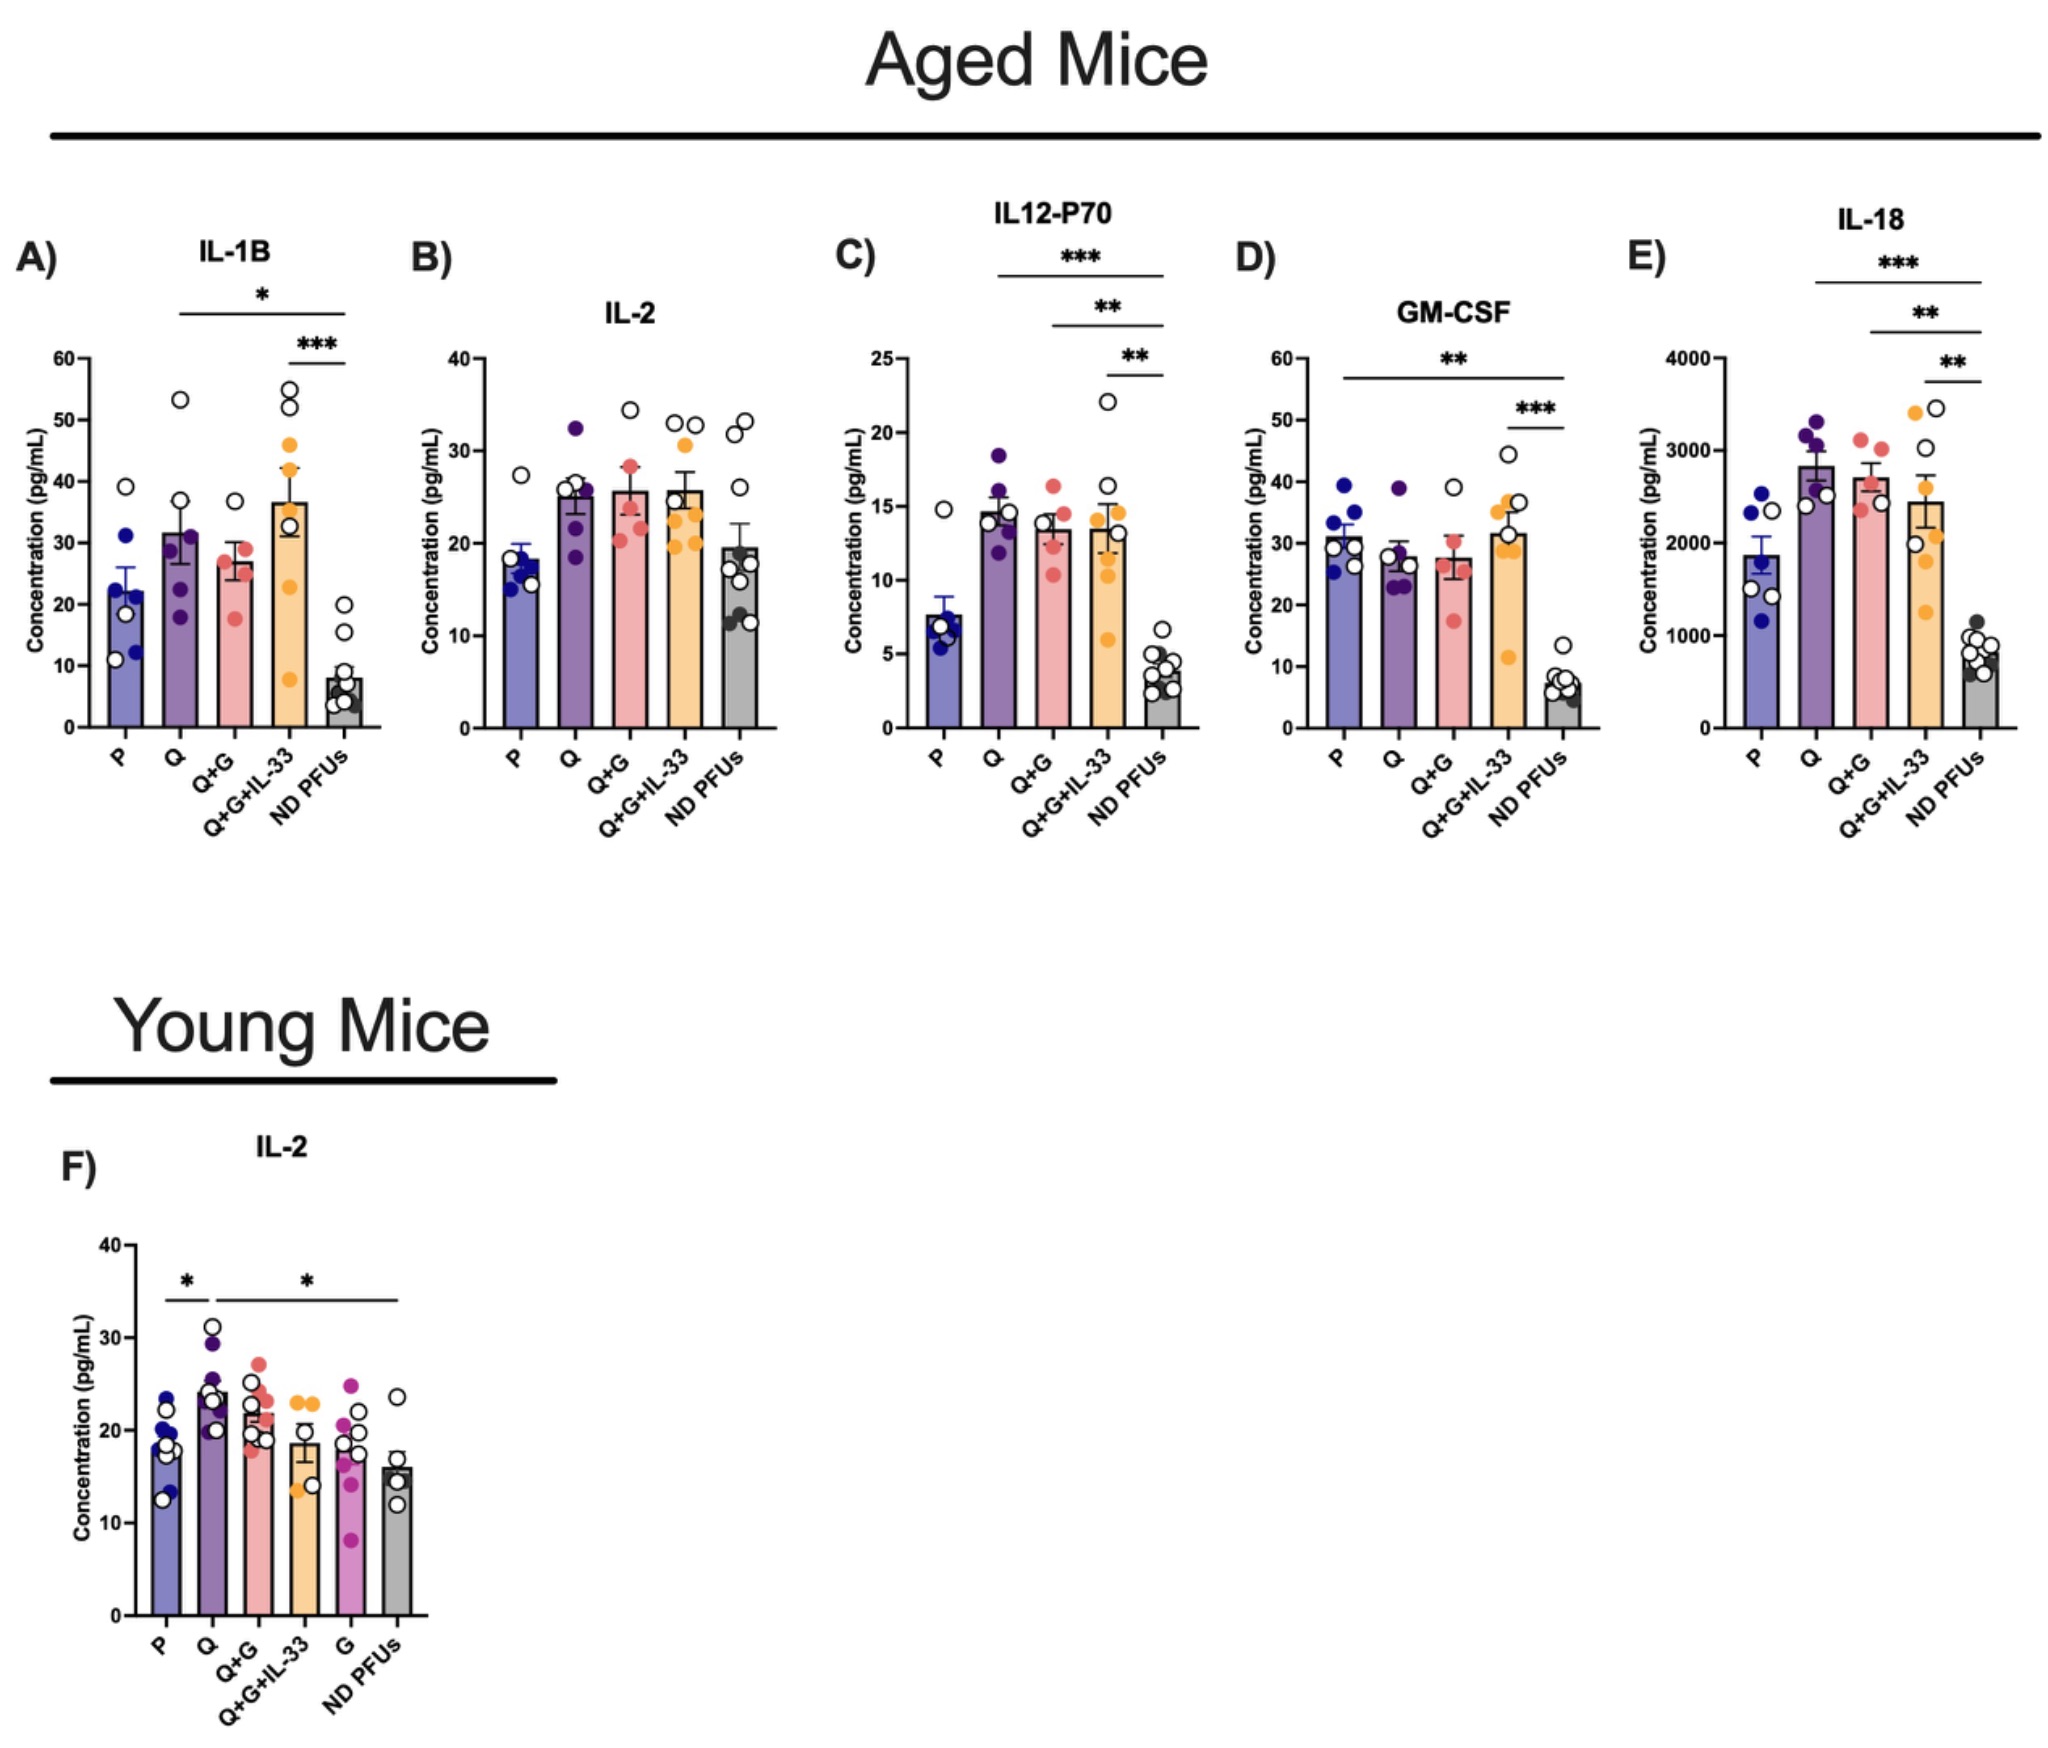


Supplementary Figure 16.  **Characterization of lung homogenate cytokine levels 6 days post-intranasal infection with 3LD50 IVR-180 using cytokine multiplex assay.** Lung homogenate concentrations (in pg/mL) of **(A)**  IL-1β, **(B)** IL-2**, (C)** IL-12p70, **(D)** GM-CSF, (**E)** and IL-18 in aged mice lung homogenates 6 days post-infection with 3LD50 IVR-180 of P, Q, Q+G, Q+G+IL-33, and ND PFUs groups. **(F)** Lung homogenate concentrations (in pg/mL) of IL-2 in young mice lung homogenates 6 days post-infection with 3LD50 IVR-180 of P, Q, Q+G, Q+G+IL-33, G and ND PFUs groups. * P ≤ 0.05 ** P ≤ 0.01 *** P ≤ 0.001 **** P ≤ 0.0001 (Kruskall-Wallis followed by Dunn’s multiple comparisons test).


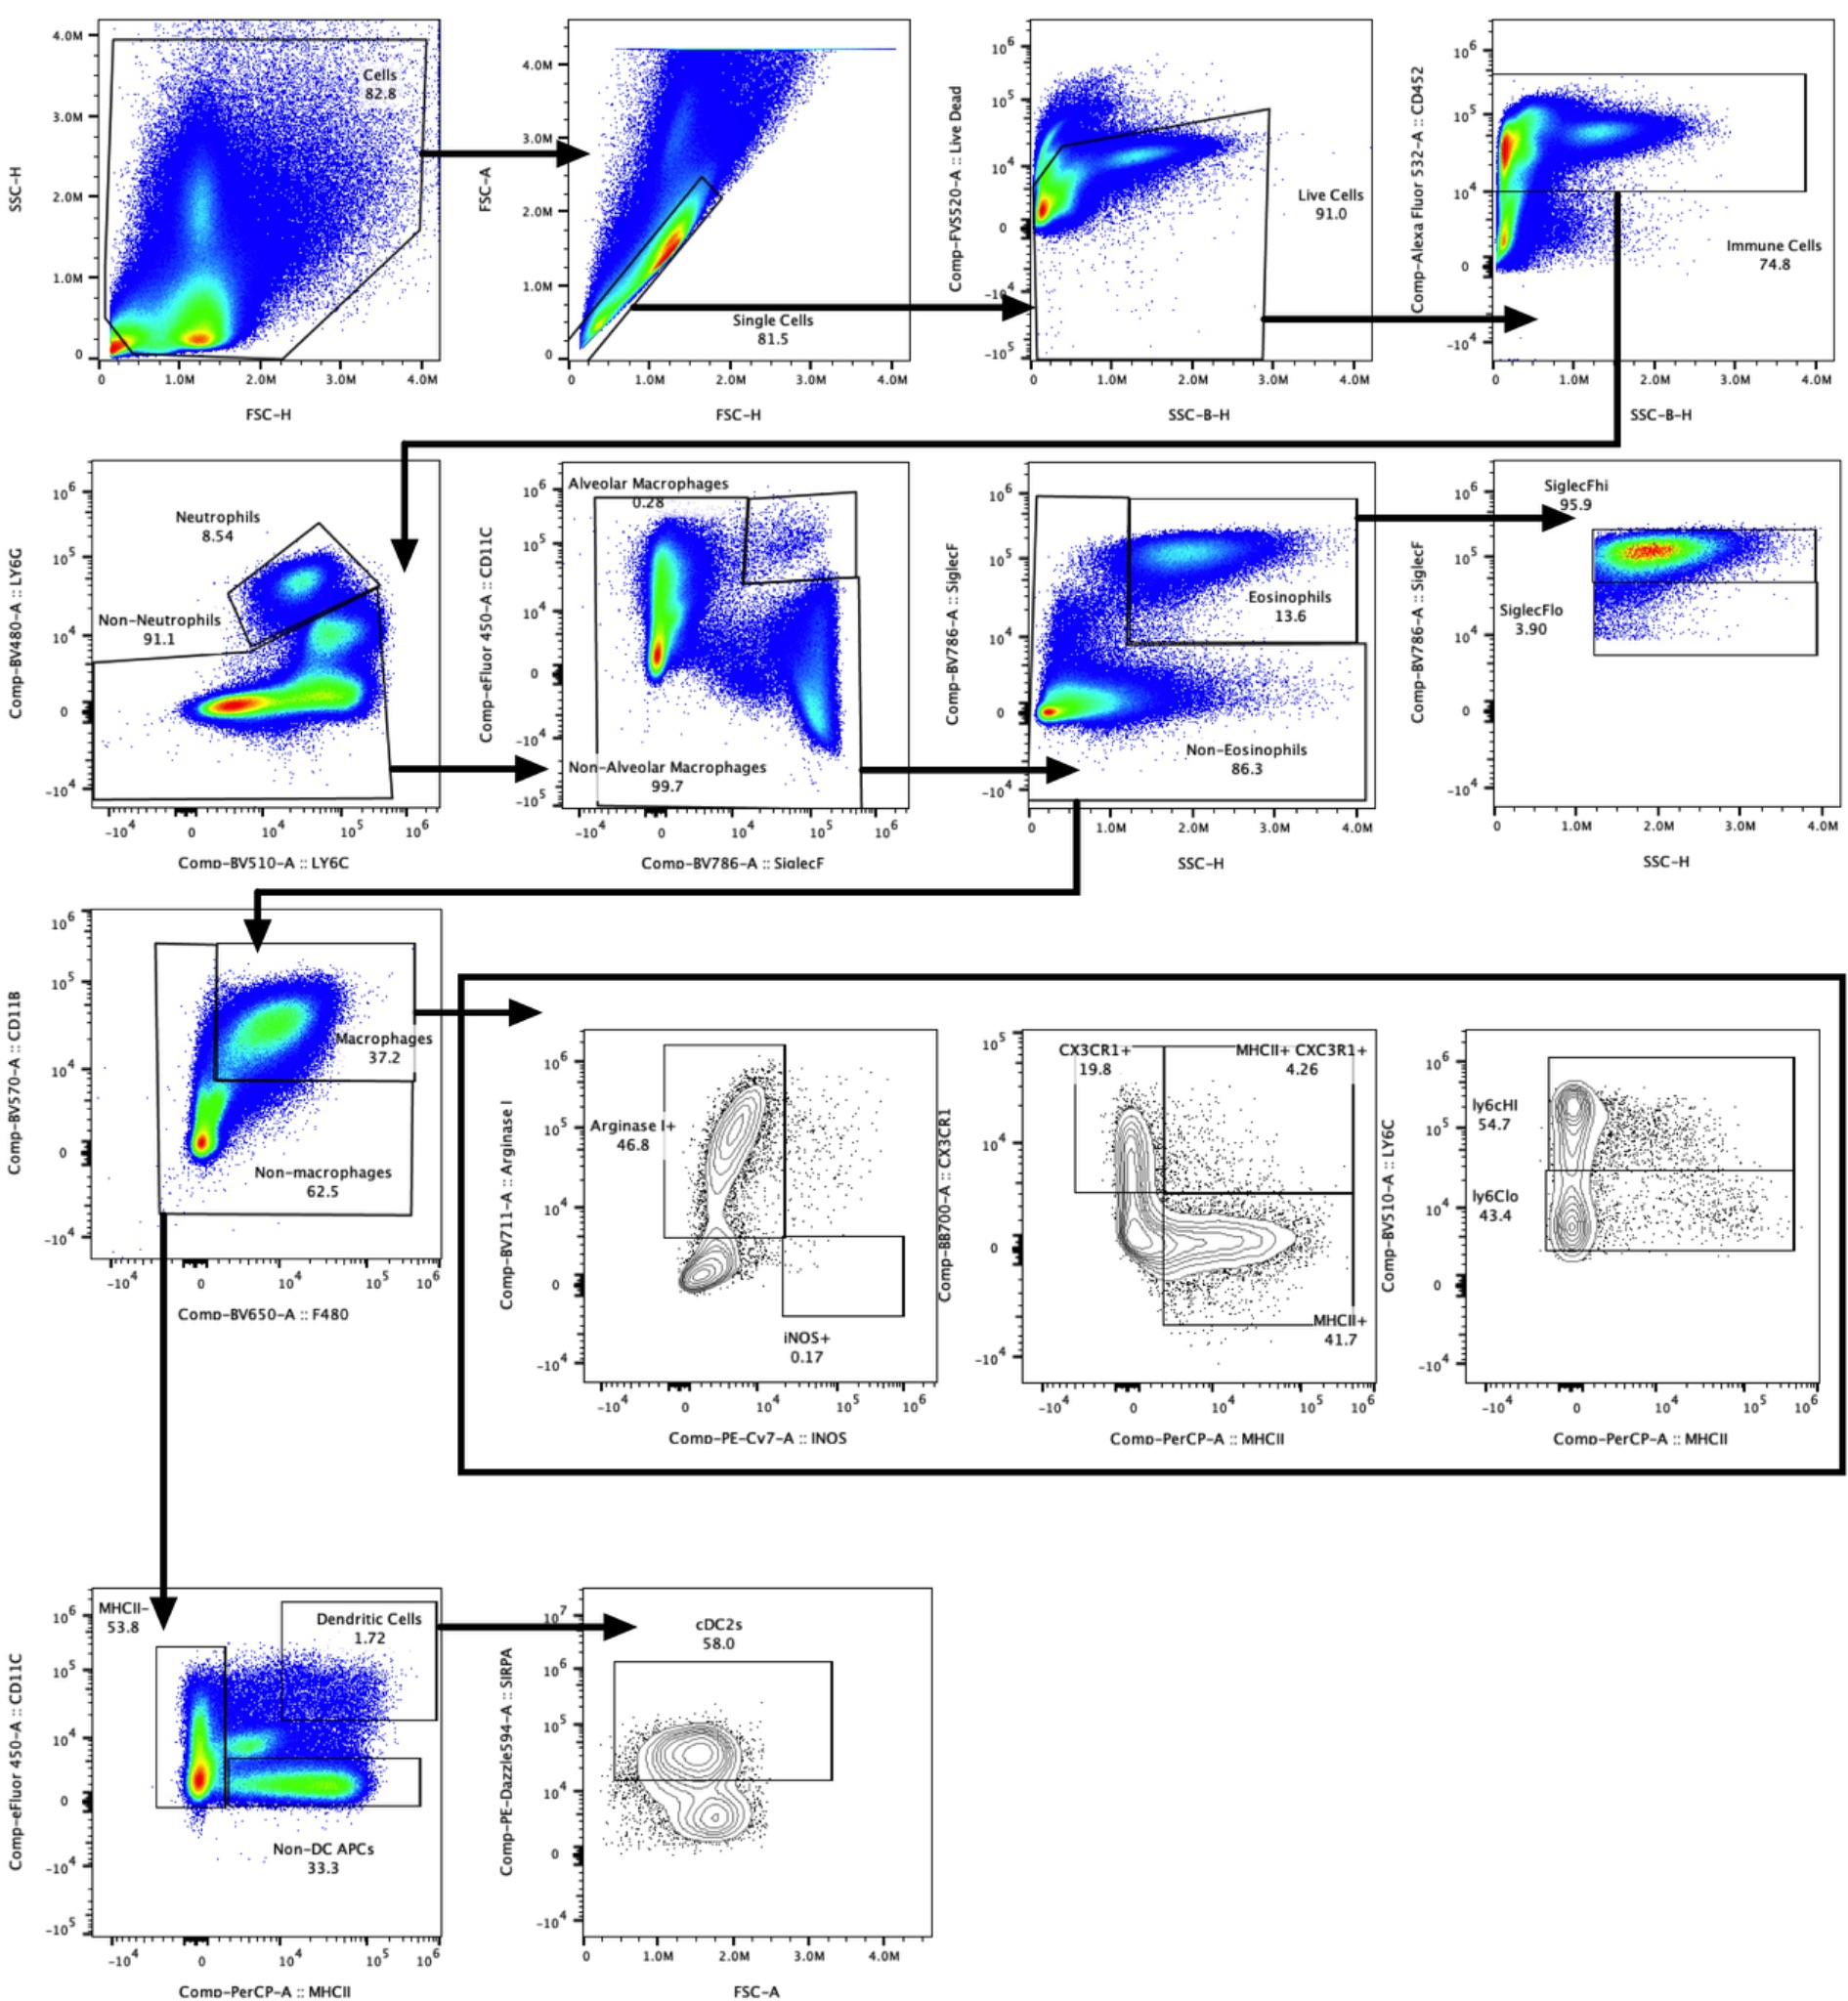


Supplementary Figure 17. **Spectral flow cytometry gating strategy allows the characterization of myeloid cells and granulocytes in mouse lungs.**


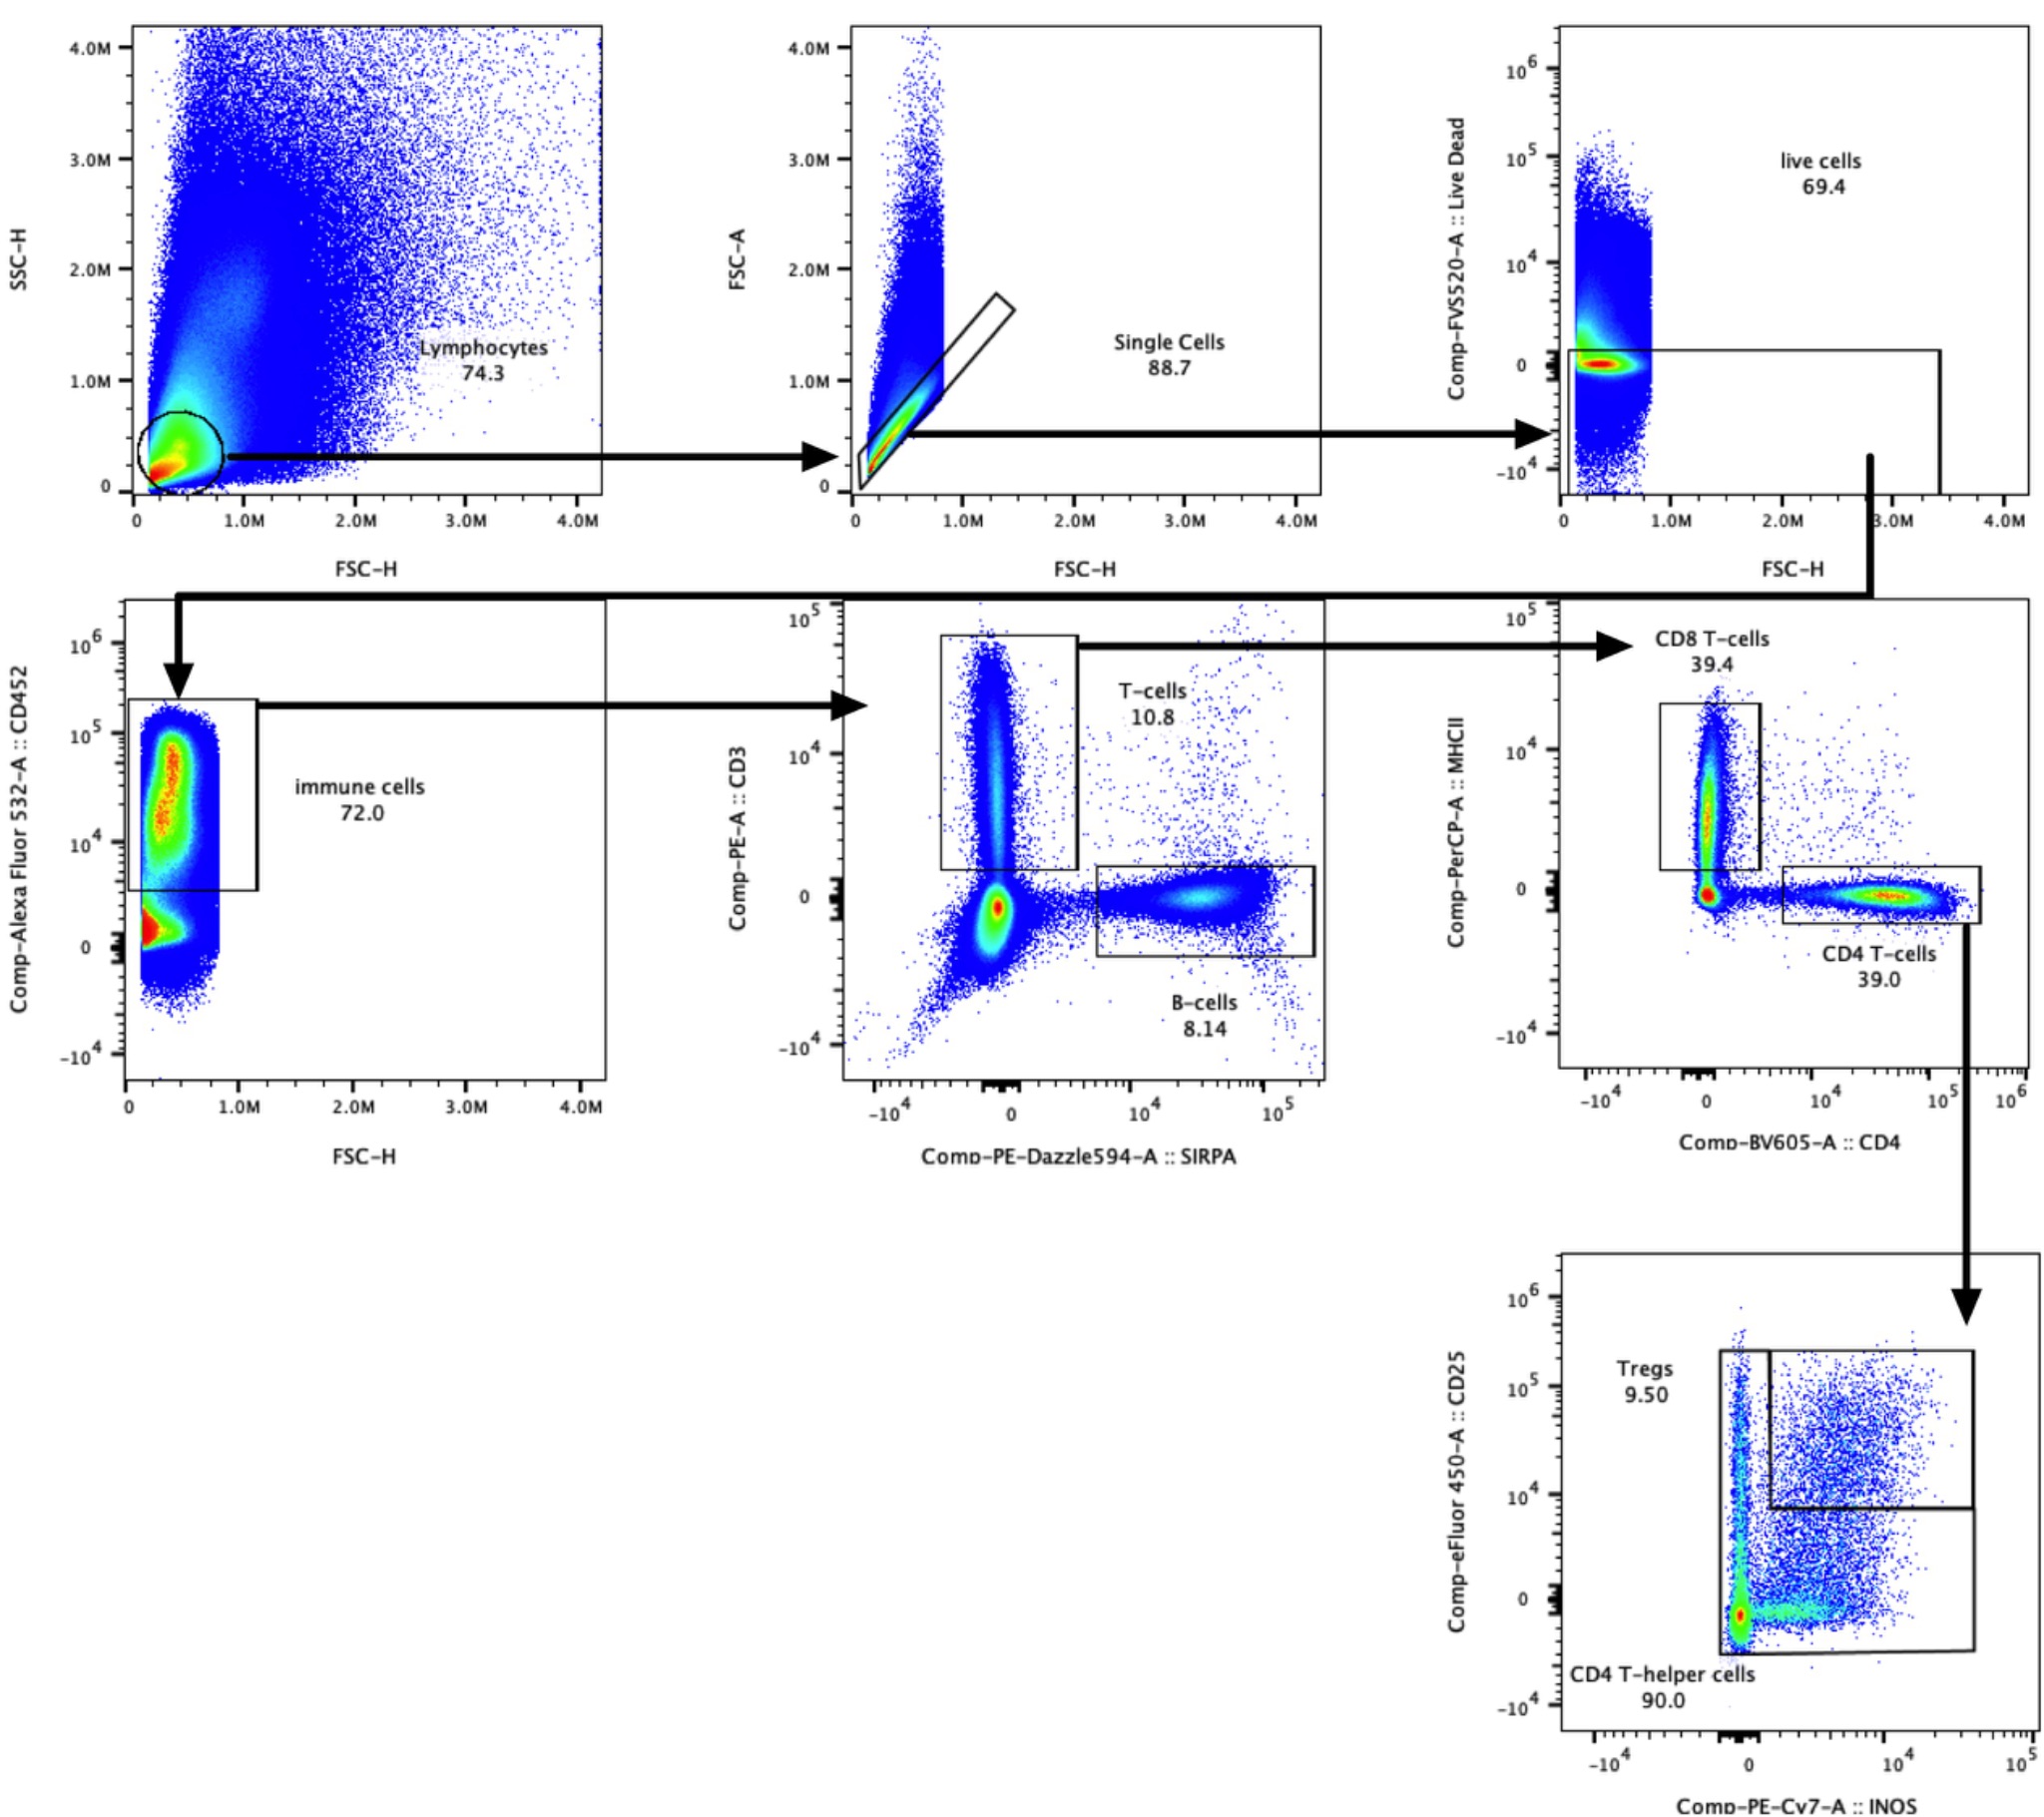


Supplementary Figure 18. **Spectral flow cytometry gating strategy allows the characterization of lymphocytes in mouse lungs.**


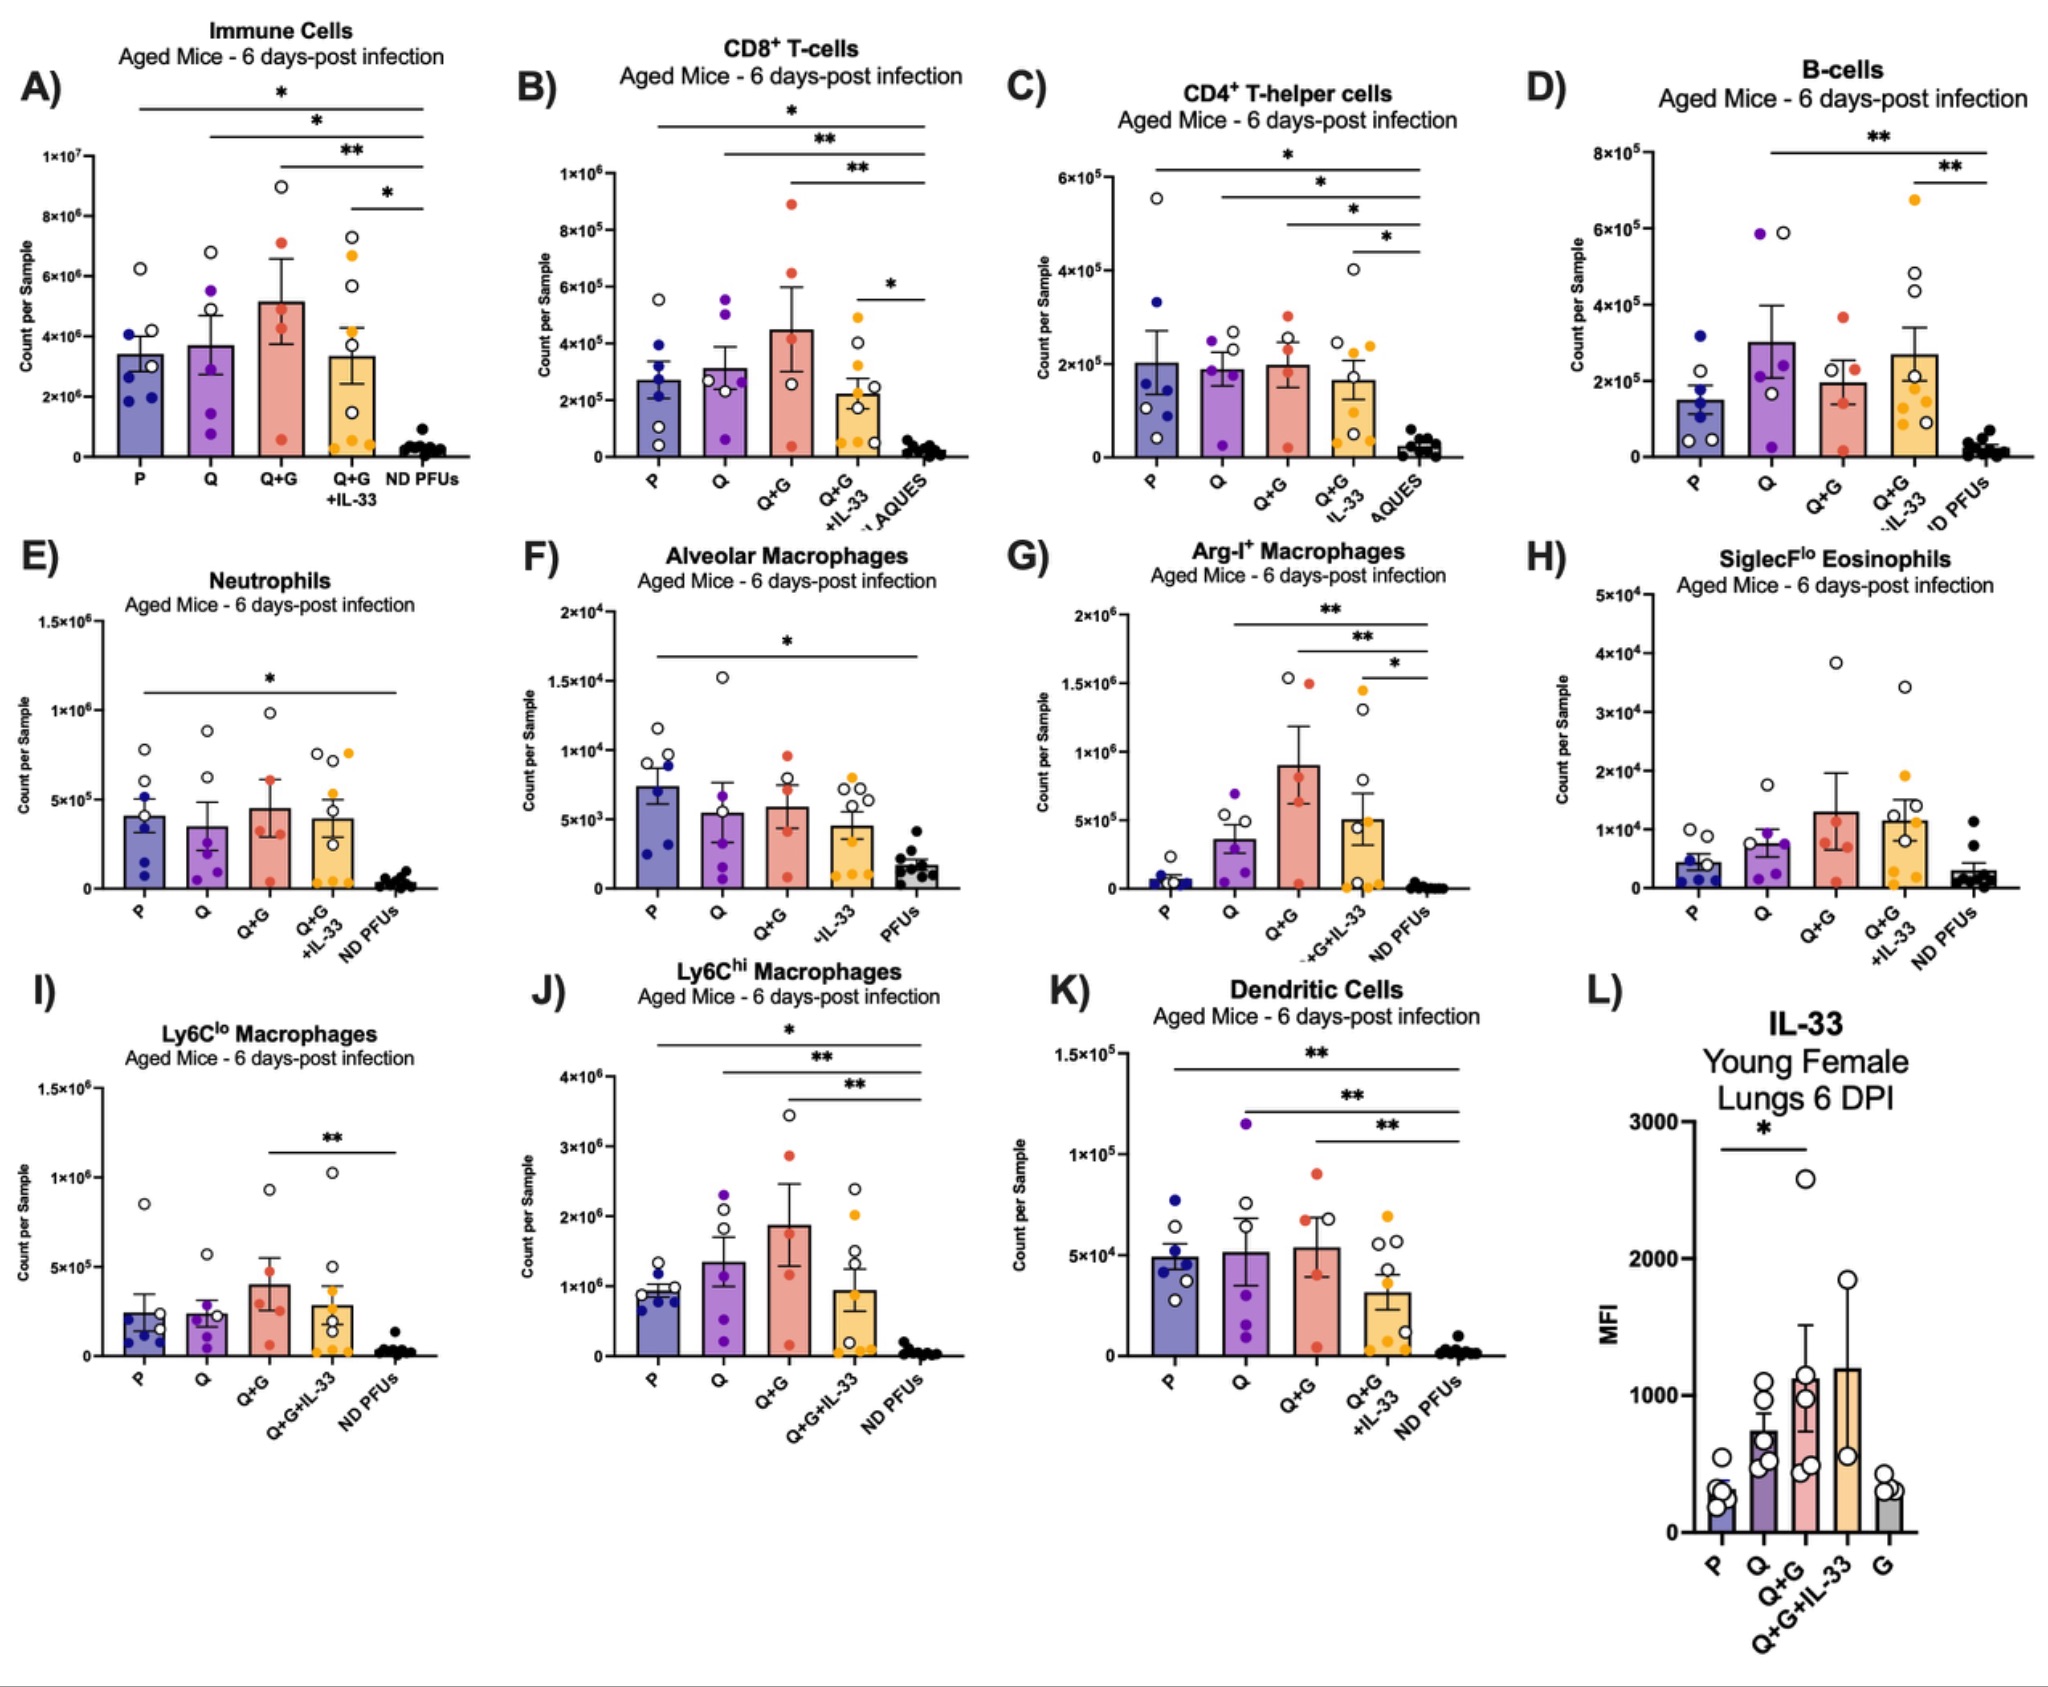


Supplementary Figure 19. **Immune characterization of aged mice lungs using spectral flow cytometry 6 days post-infection.** Count of **(A)** immune cells, **(B)** CD8+ T-cells, **(C)** CD4+ T-helper cells, **(D)** B-cells, **(E)** neutrophils, **(F)** alveolar macrophages, **(G)** Arginase I+ macrophages, **(H)** Siglec-Flo eosinophils, **(I)** Ly6Clo macrophages, **(J)** Ly6Chi macrophages, and **(K)** dendritic cells in aged male lungs 6 days post-infection with IVR-180 of P, Q, Q+G, Q+G+IL-33, and ND PFUs groups. **(L)** Quantification of IL-33 MFIs 6 days post-infection with 3LD50 (300 PFUs/mouse) dose IVR-180 (A/Michigan/25/2015, H1N1) in lungs of P, Q, Q+G, Q+G+IL-33, and G in young female mice.* P ≤ 0.05 ** P ≤ 0.01 *** P ≤ 0.001 **** P ≤ 0.0001 (Kruskall-Wallis followed by Dunn’s multiple comparisons test).
